# Supplementary material for: Arene C–H activation by gold(iii): solvent-enabled proton shuttling, and observation of a pre-metallation Au–arene intermediate
Source: Royal Society of Chemistry journal article supplement (doi:10.1039/c7cc01628j), 2017-01-01
Supplement: c7cc01628j1.pdf [file c7cc01628j1.pdf]

## ELECTRONIC SUPPORTING INFORMATION

### Arene C-H activation by gold(III): Solvent-enabled proton shuttling, and observation of a pre-metallation Au-arene intermediate

Luca Rocchigiani,<sup>a</sup> Julio Fernandez–Cestau,<sup>a</sup> Peter H. M. Budzelaar<sup>b,\*</sup> and Manfred Bochmann<sup>a,\*</sup>

<sup>a</sup>School of Chemistry, University of East Anglia, Norwich Research Park, Norwich NR4 7TJ, UK.

<sup>b</sup>Department of Chemical Sciences, Federico II University of Naples, Via Cintia, 80126 Napoli, Italy. E-mail: [p.budzelaar@unina.it](mailto:p.budzelaar@unina.it).

**1 – General Considerations**

**2 – NMR Data**

**3 – Relevant NMR spectra**

**4 – Diffusion NMR experiments**

**5 – EXSY NMR measurement**

**6 – Details of computations**

## 1. General Considerations

When required, manipulations were performed by using standard Schlenk techniques under dry N<sub>2</sub> or in a MBraun Unilab glovebox with a high capacity recirculator (<1.0 ppm O<sub>2</sub> and H<sub>2</sub>O). All solvents were dried by means of the appropriate drying agent and distilled. Methylene chloride-*d*<sub>2</sub> and chlorobenzene-*d*<sub>5</sub> (Apollo Scientific) were stored in the glovebox over activated 4 Å molecular sieves. (C<sup>N</sup>^C)AuCl (**1a**),<sup>1</sup> (C<sup>N</sup>^C)AuOH,<sup>2</sup> (C<sup>N</sup>^C)AuC<sub>6</sub>F<sub>5</sub> (**1b**),<sup>2</sup> (C<sup>N</sup>^C)Au(*p*-C<sub>6</sub>H<sub>4</sub>F) (**1c**),<sup>2</sup> and [H(OEt<sub>2</sub>)<sub>2</sub>][H<sub>2</sub>N{B(C<sub>6</sub>F<sub>5</sub>)<sub>3</sub>}<sub>2</sub>]<sup>3</sup> were synthesized according to literature procedures. (C<sup>N</sup>^C)Au(C<sub>6</sub>H<sub>5</sub>) (**1d**) has been synthesized by adapting previously reported procedures in 87% yield.<sup>2</sup>

Protodeauration experiments were performed within the glovebox under an anaerobic and anhydrous atmosphere, by dissolving the desired gold complex (5 to 10 mg) and 1.0 molar equiv of [H(OEt<sub>2</sub>)<sub>2</sub>][H<sub>2</sub>N{B(C<sub>6</sub>F<sub>5</sub>)<sub>3</sub>}<sub>2</sub>] in approximately 0.6 mL of dry CD<sub>2</sub>Cl<sub>2</sub> or chlorobenzene-*d*<sub>5</sub> within a J-Young NMR tube.

<sup>1</sup>H, <sup>1</sup>H PGSE, <sup>19</sup>F, <sup>13</sup>C{<sup>1</sup>H}, *J*-resolved <sup>13</sup>C, <sup>1</sup>H COSY, <sup>1</sup>H NOESY, <sup>1</sup>H EXSY, <sup>1</sup>H,<sup>13</sup>C HMQC, coupled <sup>1</sup>H,<sup>13</sup>C HMQC and <sup>1</sup>H,<sup>13</sup>C HMBC NMR experiments have been recorded on a Bruker DPX-300 spectrometer equipped with a <sup>1</sup>H, BB smartprobe and Z-gradients. <sup>1</sup>H NMR spectra are referenced to the residual protons of the deuterated solvent. <sup>13</sup>C NMR spectra are referenced to the D-coupled <sup>13</sup>C signals of the solvent. <sup>19</sup>F NMR spectra are referenced to an external standard of CFCl<sub>3</sub>.

## 2. NMR data

(C<sup>N</sup>^C)Au(C<sub>6</sub>H<sub>5</sub>) **1d**. <sup>1</sup>H NMR (300.13 MHz, CD<sub>2</sub>Cl<sub>2</sub>, 297K, *J* values in Hz): 7.76 (t, <sup>3</sup>*J*<sub>HH</sub> = 7.9, 1H, H1), 7.69 (dd, <sup>3</sup>*J*<sub>HH</sub> = 8.0, <sup>4</sup>*J*<sub>HH</sub> = 1.2, 2H, H11), 7.52 (d, <sup>3</sup>*J*<sub>HH</sub> = 8.2, 2H, H5), 7.48 (d, <sup>4</sup>*J*<sub>HH</sub> = 2.0, 2H, H8), 7.41 (d, <sup>3</sup>*J*<sub>HH</sub> = 7.9, 2H, H2), 7.34 (m, 2H, H12), 7.24 (m, 3H, H6+H13), 1.26 ppm (s, 18H, -CMe<sub>3</sub>). <sup>13</sup>C{<sup>1</sup>H} NMR (75.47 MHz, CD<sub>2</sub>Cl<sub>2</sub>, 297K): 168.3 (s, C9), 163.1 (s, C3), 154.3 (s, C7), 147.8 (s, C10), 147.2 (s, C4), 141.6 (s, C1), 134.4 (s, C11), 132.3 (s, C8), 128.5 (s, C12), 124.7 (s, C5), 124.6 (s, C13), 123.3 (s, C6), 116.0 (s, C2), 35.1 (s, CMe<sub>3</sub>), 30.9 ppm (s, CMe<sub>3</sub>). Anal. Calcd. (Found) for C<sub>31</sub>H<sub>32</sub>AuN: C 60.49 (60.13), H 5.24 (5.13), N 2.28 (2.71).

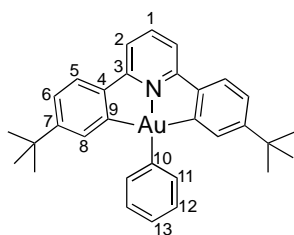

[(C<sup>N</sup>^CH)AuCl(OEt<sub>2</sub>)][H<sub>2</sub>N{B(C<sub>6</sub>F<sub>5</sub>)<sub>3</sub>}<sub>2</sub>] **2a**

1) K.-H. Wong, K.-K. Cheung, M. C.-W. Chan, C.-M. Che, *Organometallics* 1998, **17**, 3505.

2) D. A. Rosca, D. A. Smith, M. Bochmann, *Chem. Commun.* 2012, **48**, 7247.

3) S. J. Lancaster, A. Rodriguez, A. Lara-Sanchez, M. D. Hannant, D. A. Walker, D. L. Hughes, M. Bochmann, *Organometallics* 2002, **21**, 453.

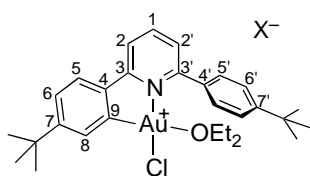

$^1\text{H}$  NMR (300.13 MHz,  $\text{CD}_2\text{Cl}_2$ , 297K,  $J$  values in Hz):  $\delta$  8.27 (t,  $^3J_{\text{HH}} = 7.9$ , 1H, H1), 7.98 (d,  $^3J_{\text{HH}} = 7.9$ , 1H, H2), 7.76 (AB system, 4H, H5'+H6'), 7.71 (d,  $^4J_{\text{HH}} = 1.3$ , 1H, H8), 7.66 (d,  $^3J_{\text{HH}} = 7.9$ , 1H, H2'), 7.55 (dd,  $^3J_{\text{HH}} = 8.1$ ,  $^4J_{\text{HH}} = 1.3$ , 1H, H6), 7.50 ( $^3J_{\text{HH}} = 8.1$ , 1H, H5), 5.67 (br,  $\text{NH}_2$ ), 1.40 (s, 9H,  $\text{CMe}_3$ '), 1.37 ppm (s, 9H,  $\text{CMe}_3$ ).  $^{19}\text{F}$  NMR (282.4 MHz,  $\text{CD}_2\text{Cl}_2$ , 297K,  $J$  values in Hz):  $\delta$  -132.9 (d,  $^3J_{\text{FF}} = 19.3$ , 2F,  $o\text{-F}$   $\text{H}_2\text{N}\{\text{B}(\text{C}_6\text{F}_5)_3\}_2$ ), -160.2 (7,  $^3J_{\text{FF}} = 20.8$ , 1F,  $p\text{-F}$   $\text{H}_2\text{N}\{\text{B}(\text{C}_6\text{F}_5)_3\}_2$ ), -165.6 (m, 2F,  $m\text{-F}$   $\text{H}_2\text{N}\{\text{B}(\text{C}_6\text{F}_5)_3\}_2$ ). Selected  $^{13}\text{C}\{^1\text{H}\}$  NMR (75.47 MHz,  $\text{C}_6\text{D}_5\text{Cl}$ , 297K):  $\delta$  162.1 (s, C3), 158.6 (s, C7), 157.3 (s, C3'), 157.0 (s, C7'), 143.5 (s, C1), 136.1 (s, C4), 134.4 (s, C4'), 130.9 (s, C6'), 129.7 (s, C8), 127.9 (buried under solvent, C6), 125.0 (buried under solvent, C2'+C5'), 119.5 (s, C2), 36.3 (s,  $\text{CMe}_3$ ), 35.3 (s,  $\text{CMe}_3'$ ), 30.6 ppm (s,  $\text{CMe}_3 + \text{CMe}_3'$ ).

**[[C<sup>N</sup>CHAu(C<sub>6</sub>F<sub>5</sub>)(Et<sub>2</sub>O)][H<sub>2</sub>N{B(C<sub>6</sub>F<sub>5</sub>)<sub>3</sub>]<sub>2</sub>] 2b**

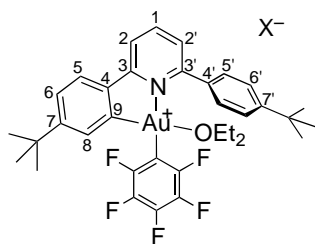

$^1\text{H}$  NMR (300.13 MHz,  $\text{CD}_2\text{Cl}_2$ , 297K,  $J$  values in Hz):  $\delta$  8.30 (t,  $^3J_{\text{HH}} = 7.9$ , 1H, H1), 8.06 (d,  $^3J_{\text{HH}} = 7.9$ , 1H, H2), 7.88 (d,  $^3J_{\text{HH}} = 8.5$ , 2H, H5'), 7.81 (br d, 3H H6'+H2'), 7.69 (d,  $^3J_{\text{HH}} = 8.3$ , 1H, H5), 7.52 (brd,  $^3J_{\text{HH}} = 8.3$ , 1H, H6), 6.54 (brs, 1H, H8), 5.68 (brs,  $\text{NH}_2$ ), 1.37 (s, 9H,  $\text{CMe}_3$ '), 1.17 (s, 9H,  $\text{CMe}_3$ ).  $^{19}\text{F}$  NMR (282.36 MHz,  $\text{CD}_2\text{Cl}_2$ , 297K,  $J$  values in Hz):  $\delta$  -121.6 (br,  $o\text{-F}$   $\text{Au-C}_6\text{F}_5$ ), -133.0 (br d,  $^3J_{\text{FF}} = 19.0$ ,  $o\text{-F}$   $\text{H}_2\text{N}[\text{B}(\text{C}_6\text{F}_5)_3]_2^-$ ), -151.3 (br,  $p\text{-F}$   $\text{Au-C}_6\text{F}_5$ ), -158.1 (br,  $m\text{-F}$   $\text{Au-C}_6\text{F}_5$ ), -160.2 (t,  $^3J_{\text{FF}} = 20.4$ ,  $p\text{-F}$   $\text{H}_2\text{N}[\text{B}(\text{C}_6\text{F}_5)_3]_2^-$ ), -165.7 ppm (m,  $m\text{-F}$   $\text{H}_2\text{N}[\text{B}(\text{C}_6\text{F}_5)_3]_2^-$ ).  $^{13}\text{C}\{^1\text{H}\}$  NMR (75.47 MHz,  $\text{CD}_2\text{Cl}_2$ , 297K):  $\delta$  160.6 (s, C3), 159.4 (br s, C3'), 158.0 (s, C7), 156.2 (s, C7'), 147.8 (br d,  $^1J_{\text{CF}} = 240.0$ ,  $o\text{-C}$   $\text{H}_2\text{N}[\text{B}(\text{C}_6\text{F}_5)_3]_2^-$ ), 143.9 (s, C1), 139.6 (br s, C9), 139.1 (br d,  $^1J_{\text{CF}} = 248.0$ ,  $p\text{-C}$   $\text{H}_2\text{N}[\text{B}(\text{C}_6\text{F}_5)_3]_2^-$ ), 137.7 (s, C4), 136.7 (br d,  $^1J_{\text{CF}} = 246.0$ ,  $m\text{-C}$   $\text{H}_2\text{N}[\text{B}(\text{C}_6\text{F}_5)_3]_2^-$ ), 134.6 (s, C4'), 130.2 (s, C8), 129.2 (br s, C6'), 127.9 (s, C6), 127.6 (s, C5), 127.0 (br s, C5'), 126.4 (s, C2'), 119.4 (s, C2), 35.6 (s,  $\text{CMe}_3$ ), 35.2 (s,  $\text{CMe}_3'$ ), 30.7 (s,  $\text{CMe}_3'$ ), 30.4 ppm (s,  $\text{CMe}_3$ ).

**[[C<sup>N</sup>CHAu(*p*-C<sub>6</sub>H<sub>4</sub>F)(Et<sub>2</sub>O)][H<sub>2</sub>N{B(C<sub>6</sub>F<sub>5</sub>)<sub>3</sub>]<sub>2</sub>] 2c**

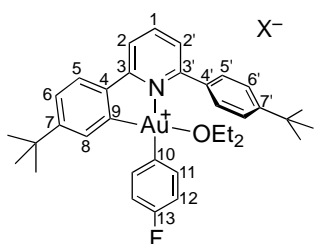

$^1\text{H}$  NMR (300.13 MHz,  $\text{CD}_2\text{Cl}_2$ , 297K,  $J$  values in Hz):  $\delta$  8.21 (t,  $^3J_{\text{HH}} = 7.9$ , 1H, H1), 8.07 (d,  $^3J_{\text{HH}} = 7.9$ , 1H, H2), 7.78 (d,  $^3J_{\text{HH}} = 8.6$ , 1H, H6'), 7.74 (d,  $^3J_{\text{HH}} = 8.6$ , 2H, H5'), 7.71 (m, 3H, H5+H2'), 7.51 (m, 2H, H11), 7.44 (dd,  $^3J_{\text{HH}} = 8.3$ ,  $^4J_{\text{HH}} = 1.5$ , 1H, H6), 7.11 (m, 2H, H12), 6.60 (d,  $^4J_{\text{HH}} = 1.5$ , 1H, H8), 5.68 (br s,  $\text{NH}_2$ ), 1.38 (s, 9H,  $\text{CMe}_3$ '), 1.11 ppm (s, 9H,  $\text{CMe}_3$ ).  $^{19}\text{F}$  NMR (282.36 MHz,  $\text{CD}_2\text{Cl}_2$ , 297K): -113.2 ppm (br,  $p\text{-F}$ ), -133.0 (br d,  $^3J_{\text{FF}} =$

19.0, *o*-F H<sub>2</sub>N[B(C<sub>6</sub>F<sub>5</sub>)<sub>3</sub>]<sub>2</sub><sup>-</sup>), -160.2 (t, <sup>3</sup>J<sub>FF</sub> = 20.4, *p*-F H<sub>2</sub>N[B(C<sub>6</sub>F<sub>5</sub>)<sub>3</sub>]<sub>2</sub><sup>-</sup>), -165.7 ppm (m, *m*-F H<sub>2</sub>N[B(C<sub>6</sub>F<sub>5</sub>)<sub>3</sub>]<sub>2</sub><sup>-</sup>). <sup>13</sup>C{<sup>1</sup>H} NMR (75.47 MHz, CD<sub>2</sub>Cl<sub>2</sub>, 297K, J values in Hz): 162.5 (d, <sup>1</sup>J<sub>CF</sub> = 247.7, C13), 160.1 (s, C3 or C3'), 160.0 (s, C3' or C3), 156.5 (s, C7), 155.1 (s, C7'), 147.8 (br d, <sup>1</sup>J<sub>CF</sub> = 240.0, *o*-C H<sub>2</sub>N[B(C<sub>6</sub>F<sub>5</sub>)<sub>3</sub>]<sub>2</sub><sup>-</sup>), 142.5 (s, C1), 140.0 (d, <sup>5</sup>J<sub>CF</sub> = 2.9, C10), 139.0 (br d, <sup>1</sup>J<sub>CF</sub> = 250.0, *p*-C H<sub>2</sub>N[B(C<sub>6</sub>F<sub>5</sub>)<sub>3</sub>]<sub>2</sub><sup>-</sup>), 138.1 (s, C4), 136.6 (br d, <sup>1</sup>J<sub>CF</sub> = 250.0, *m*-C H<sub>2</sub>N[B(C<sub>6</sub>F<sub>5</sub>)<sub>3</sub>]<sub>2</sub><sup>-</sup>), 136.1 (br s, C9), 134.8 (s, C4'), 132.5 (d, <sup>4</sup>J<sub>CF</sub> = 7.0, C11), 132.0 (s, C8), 127.9 (s, C5'), 127.6 (s, C6'), 126.8 (s, C6), 126.5 (s, C2'), 126.2 (s, C5), 119.0 (s, C2), 117.2 (d, <sup>4</sup>J<sub>CF</sub>=21.0, C13), 35.4 (s, CMe<sub>3</sub>), 35.0 (s, CMe<sub>3</sub>'), 30.8 (s, -CMe<sub>3</sub>'), 30.4 ppm (s, CMe<sub>3</sub>).

[(C<sup>^</sup>N<sup>^</sup>CHAu(C<sub>6</sub>H<sub>5</sub>)(Et<sub>2</sub>O))][H<sub>2</sub>N{B(C<sub>6</sub>F<sub>5</sub>)<sub>3</sub>]<sub>2</sub>] **2d**

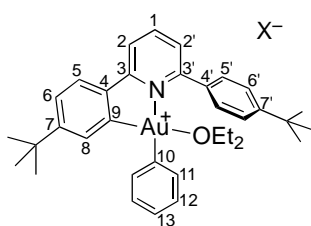

<sup>1</sup>H NMR (300.13 MHz, CD<sub>2</sub>Cl<sub>2</sub>, 297K, J values in Hz): δ 8.19 (t, <sup>3</sup>J<sub>HH</sub> = 8.0, 1H, H1), 8.06 (d, <sup>3</sup>J<sub>HH</sub> = 8.0, 1H, H2), 7.77 (d, <sup>3</sup>J<sub>HH</sub> = 8.4, 2H, H5'), 7.70 (m, 4H, H6'+H2+H5), 7.51 (br d, 2H, H11), 7.42 (dd, <sup>3</sup>J<sub>HH</sub> = 8.2, <sup>4</sup>J<sub>HH</sub> = 1.7, 1H, H6), 7.33 (br m, 3H, H12+H13), 6.64 (d, <sup>4</sup>J<sub>HH</sub> = 1.7, 1H, H8), 5.70 (br, NH<sub>2</sub>), 1.37 (s, 9H, CMe<sub>3</sub>'), 1.08 ppm (s, 9H, CMe<sub>3</sub>).

[(C<sup>^</sup>N<sup>^</sup>CHAu(C<sub>6</sub>F<sub>5</sub>))][H<sub>2</sub>N{B(C<sub>6</sub>F<sub>5</sub>)<sub>3</sub>]<sub>2</sub>] **3b**

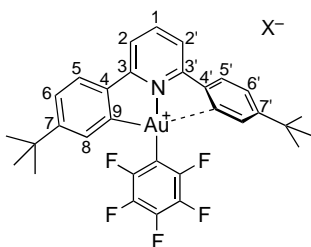

<sup>1</sup>H NMR (300.13 MHz, CD<sub>2</sub>Cl<sub>2</sub>, 297K, J values in Hz): δ 8.42 (t, <sup>3</sup>J<sub>HH</sub> = 8.0, 1H, H1), 8.18 (br d, <sup>3</sup>J<sub>HH</sub> = 7.5, 2H, H5'), 8.07 (d, <sup>3</sup>J<sub>HH</sub> = 8.0, 1H, H2), 8.02 (m, 3H, H2'+H6'), 7.72 (d, <sup>3</sup>J<sub>HH</sub> = 7.8, 1H, H5), 7.54 (br d, <sup>3</sup>J<sub>HH</sub> = 7.8, 1H, H6), 6.74 (br d, 1H, H8), 5.67 (br s, -NH<sub>2</sub>), 1.31 (s, 9H, CMe<sub>3</sub>'), 1.21 ppm (s, CMe<sub>3</sub>). <sup>19</sup>F NMR (282.36 MHz, CD<sub>2</sub>Cl<sub>2</sub>, 297K, J values in Hz): δ -120.2 (br, *o*-F Au-C<sub>6</sub>F<sub>5</sub>), -133.0 (br d, <sup>3</sup>J<sub>FF</sub>=19.0, *o*-F H<sub>2</sub>N[B(C<sub>6</sub>F<sub>5</sub>)<sub>3</sub>]<sub>2</sub><sup>-</sup>), -151.0 (br, *p*-F Au-C<sub>6</sub>F<sub>5</sub>), -158.8 (br, *m*-F Au-C<sub>6</sub>F<sub>5</sub>), -160.2 (t, <sup>3</sup>J<sub>FF</sub>=20.4, *p*-F H<sub>2</sub>N[B(C<sub>6</sub>F<sub>5</sub>)<sub>3</sub>]<sub>2</sub><sup>-</sup>), -165.7 ppm (m, *m*-F H<sub>2</sub>N[B(C<sub>6</sub>F<sub>5</sub>)<sub>3</sub>]<sub>2</sub><sup>-</sup>). <sup>13</sup>C{<sup>1</sup>H} NMR (75.47 MHz, CD<sub>2</sub>Cl<sub>2</sub>, 297K, J values in Hz): δ 159.5 (s, C7 or C3), 159.4 (s, C3 or C7), 157.3 (s, C7'), 156.0 (s, C3'), 152.5 (br s, C9), 147.8 (br d, <sup>1</sup>J<sub>CF</sub> = 240.0, *o*-C H<sub>2</sub>N[B(C<sub>6</sub>F<sub>5</sub>)<sub>3</sub>]<sub>2</sub><sup>-</sup>), 144.8 (s, C1), 139.7 (s, C4'), 139.0 (br d, <sup>1</sup>J<sub>CF</sub> = 250.0, *p*-C H<sub>2</sub>N[B(C<sub>6</sub>F<sub>5</sub>)<sub>3</sub>]<sub>2</sub><sup>-</sup>), 138.2 (br s, C6'), 136.6 (br d, <sup>1</sup>J<sub>CF</sub> = 250.0, *m*-C H<sub>2</sub>N[B(C<sub>6</sub>F<sub>5</sub>)<sub>3</sub>]<sub>2</sub><sup>-</sup>), 135.6 (s, C4), 130.5 (s, C8), 128.5 (s, C5), 128.3 (s, C6), 123.7 (s, C2'), 120.4 (s, C2), 119.6 (s, C5'), 36.1 (s, CMe<sub>3</sub>), 35.3 (s, CMe<sub>3</sub>'), 30.4 (s CMe<sub>3</sub> or CMe<sub>3</sub>'), 30.3 ppm (s CMe<sub>3</sub>' or CMe<sub>3</sub>).

### 3. Relevant NMR spectra

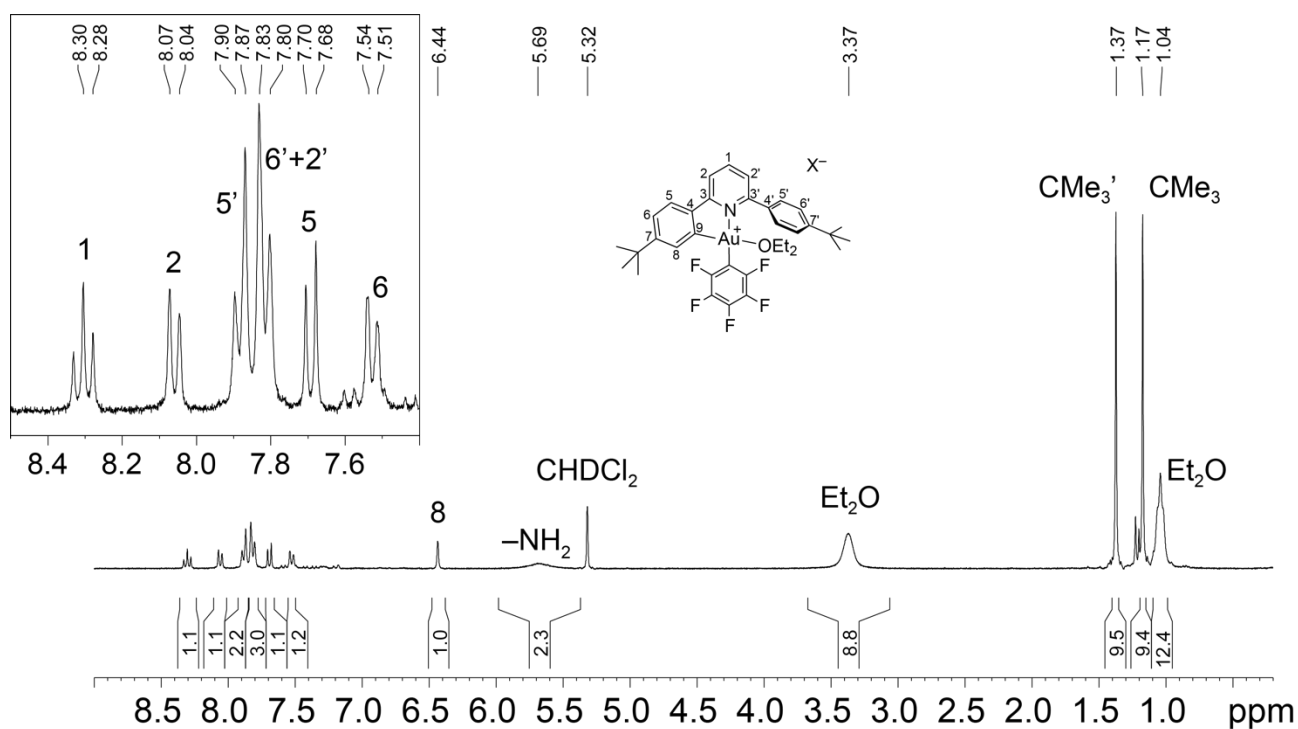

**Figure S1.**  $^1\text{H}$  NMR spectrum of **2b** (300.13 MHz, 297K,  $\text{CD}_2\text{Cl}_2$ ).

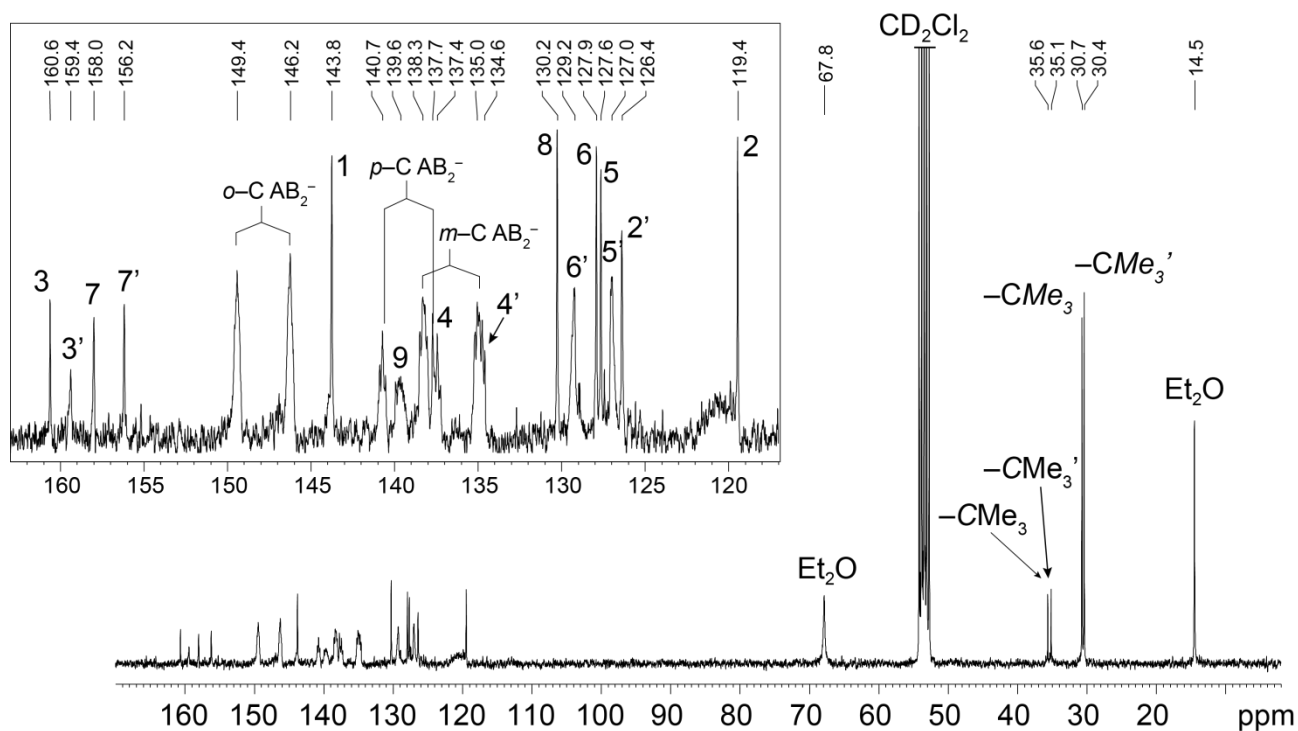

**Figure S2.**  $^{13}\text{C}\{^1\text{H}\}$  NMR spectrum of **2b** (75.47 MHz, 297K,  $\text{CD}_2\text{Cl}_2$ );  $\text{AB}_2^- = \text{H}_2\text{N}\{\text{B}(\text{C}_6\text{F}_5)_3\}_2^-$ .

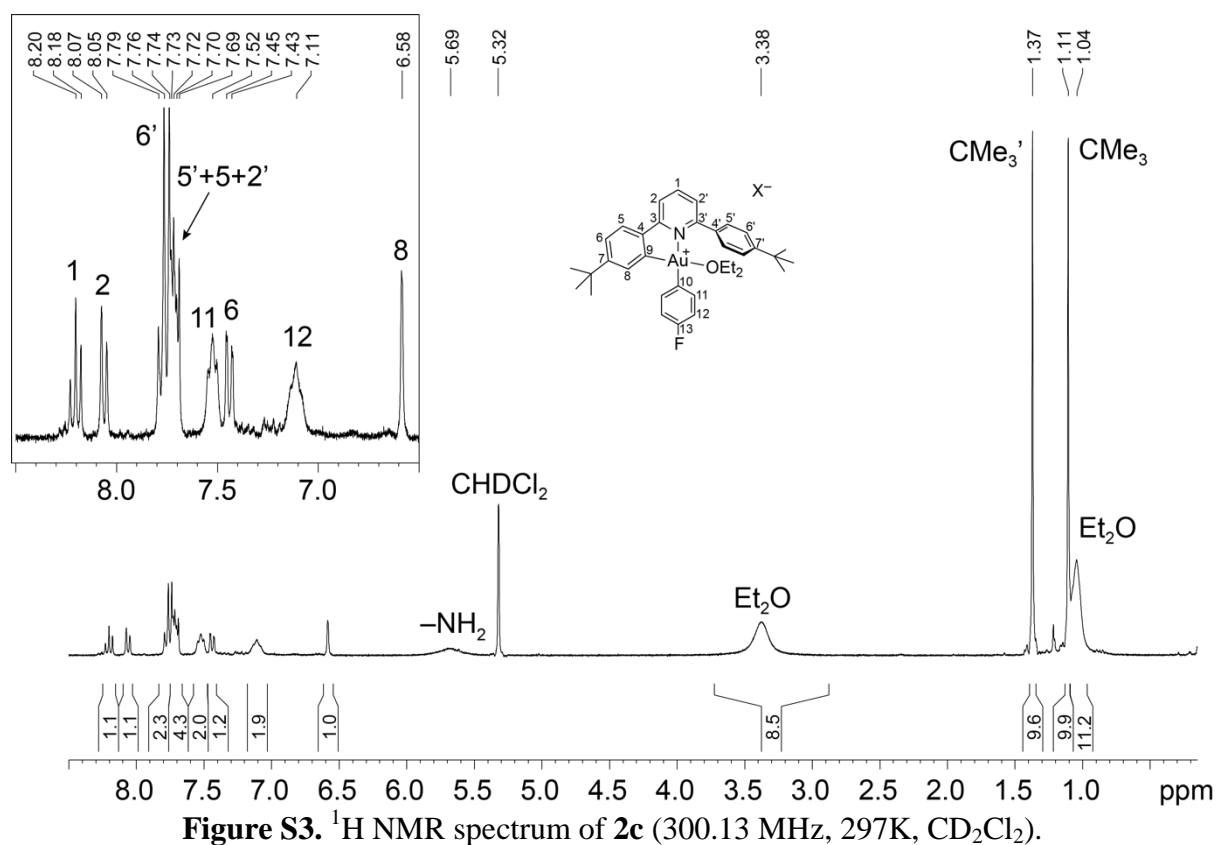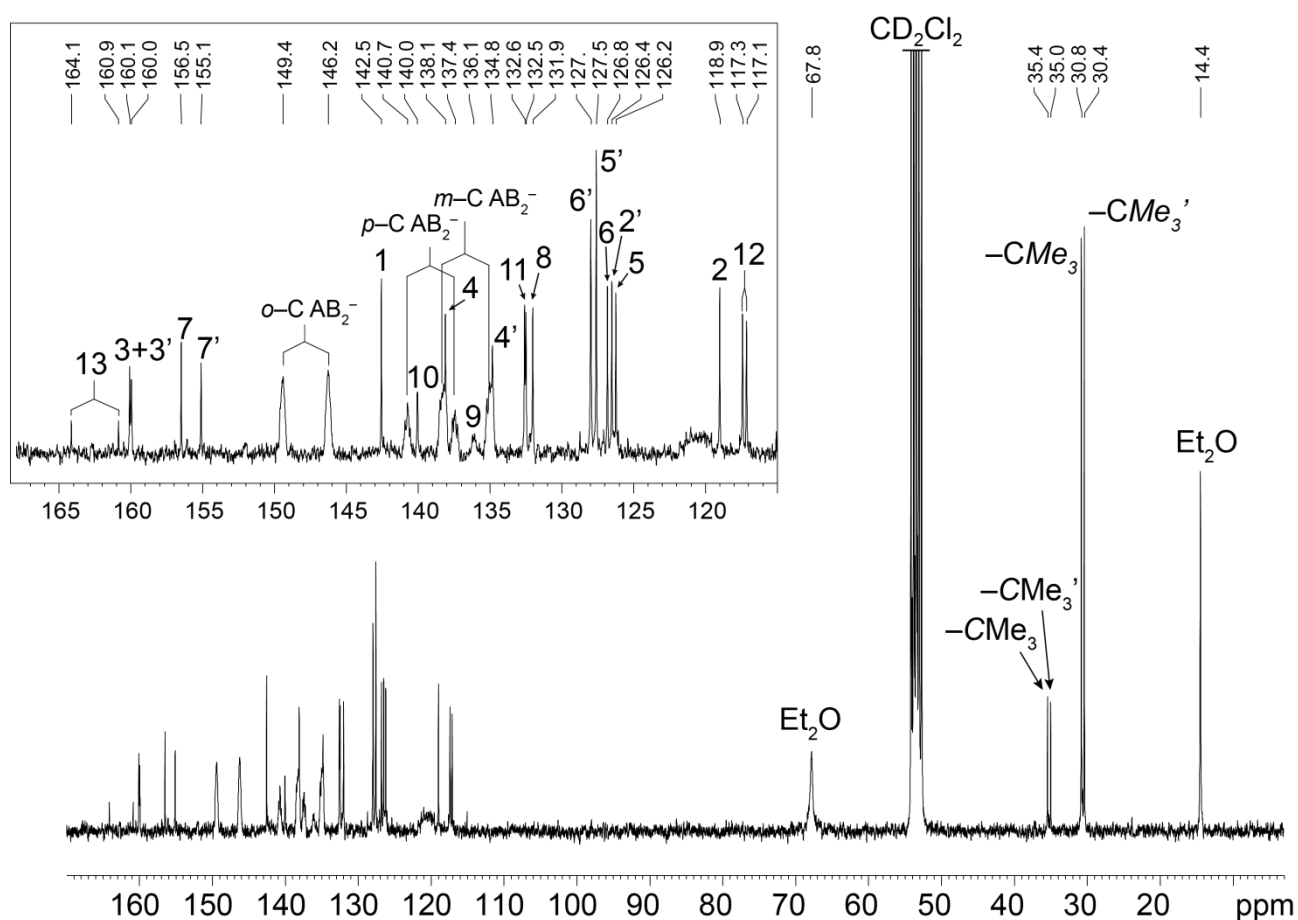

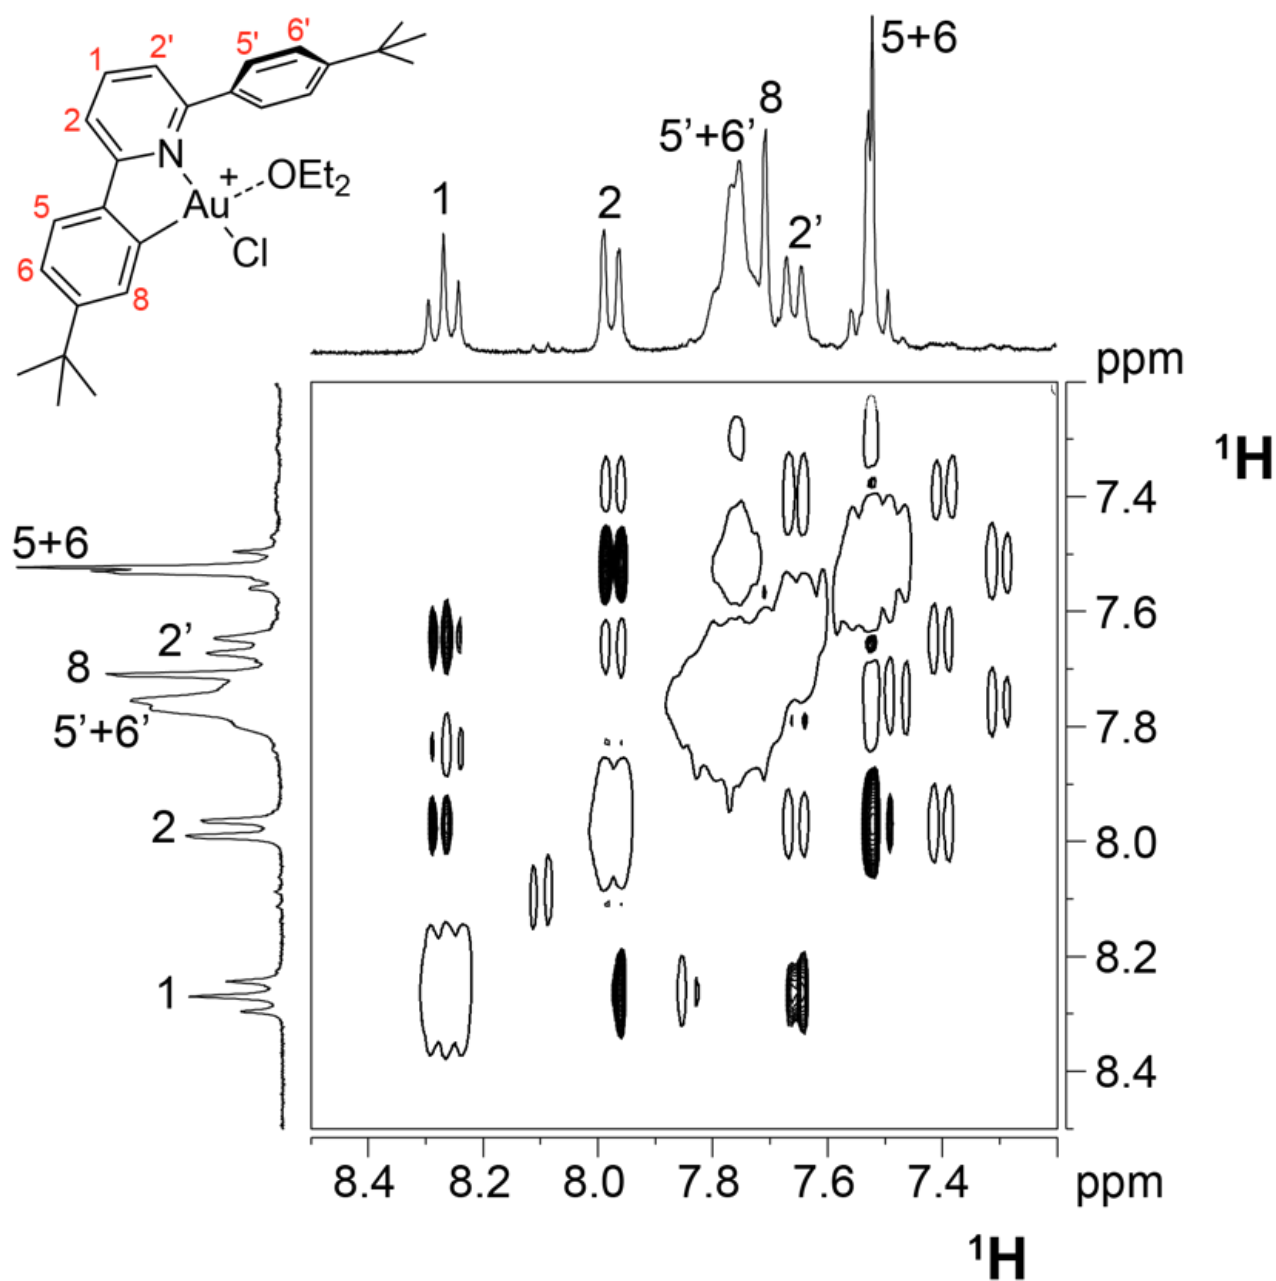

**Figure S5.** A section of the  $^1\text{H}$  NOESY spectrum of complex **2a** showing the presence of chemical exchange between cyclometallated and protodeaurated aryl moieties ( $\tau_M=0.8$  s,  $\text{CD}_2\text{Cl}_2$ , 297K).

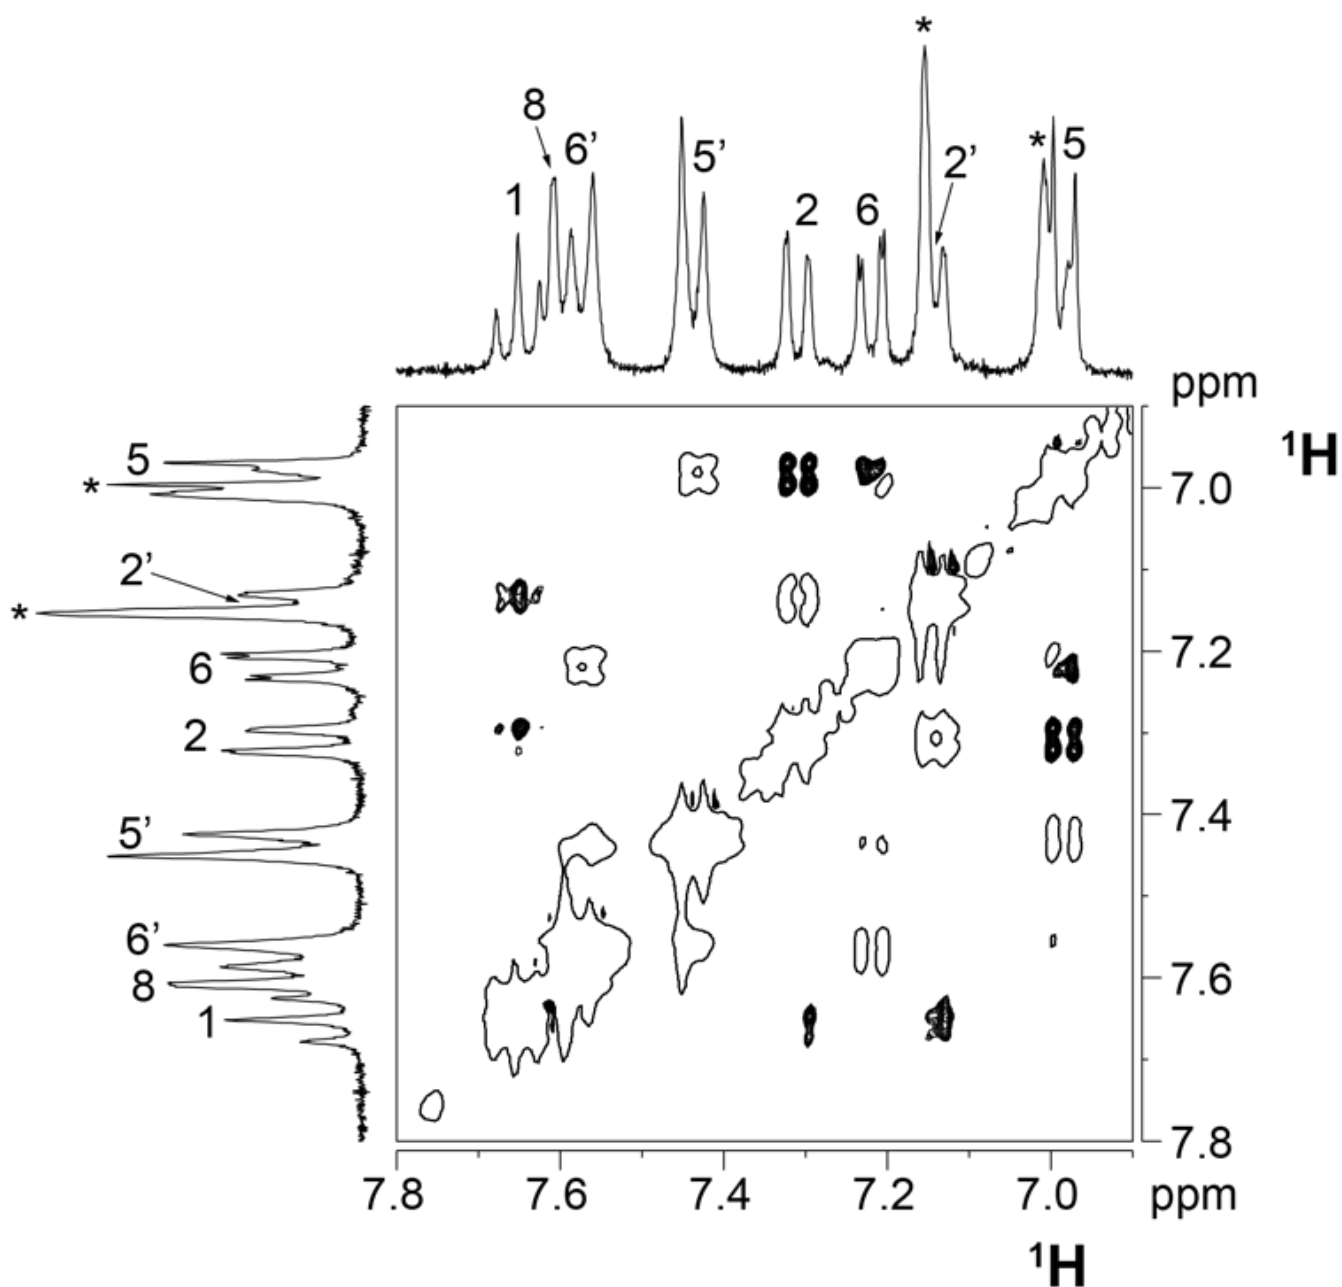

**Figure S6.** A section of the  $^1\text{H}$  NOESY spectrum of complex **2a** ( $\tau_M=0.8$  s,  $\text{C}_6\text{D}_5\text{Cl}$ , 297K); asterisks denote residual of protonated solvent.



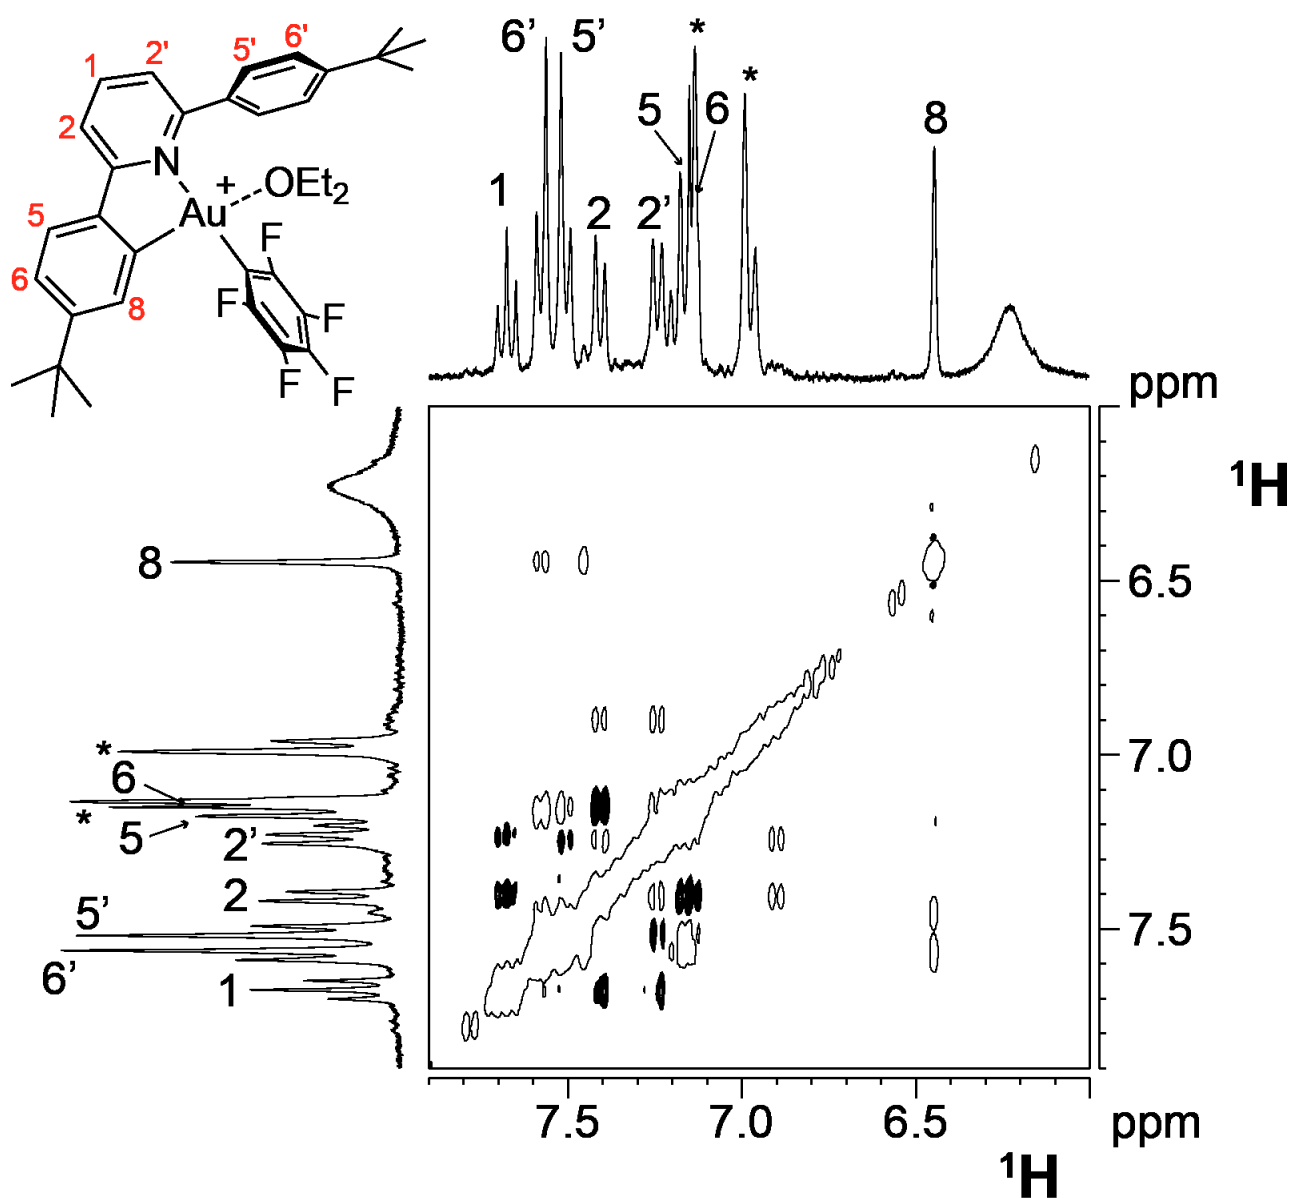

**Figure S7.** A section of the  $^1\text{H}$  NOESY spectrum of complex **2b** ( $\tau_M=0.8$  s,  $\text{C}_6\text{D}_5\text{Cl}$ , 297K); asterisks denote residual of protonated solvent.

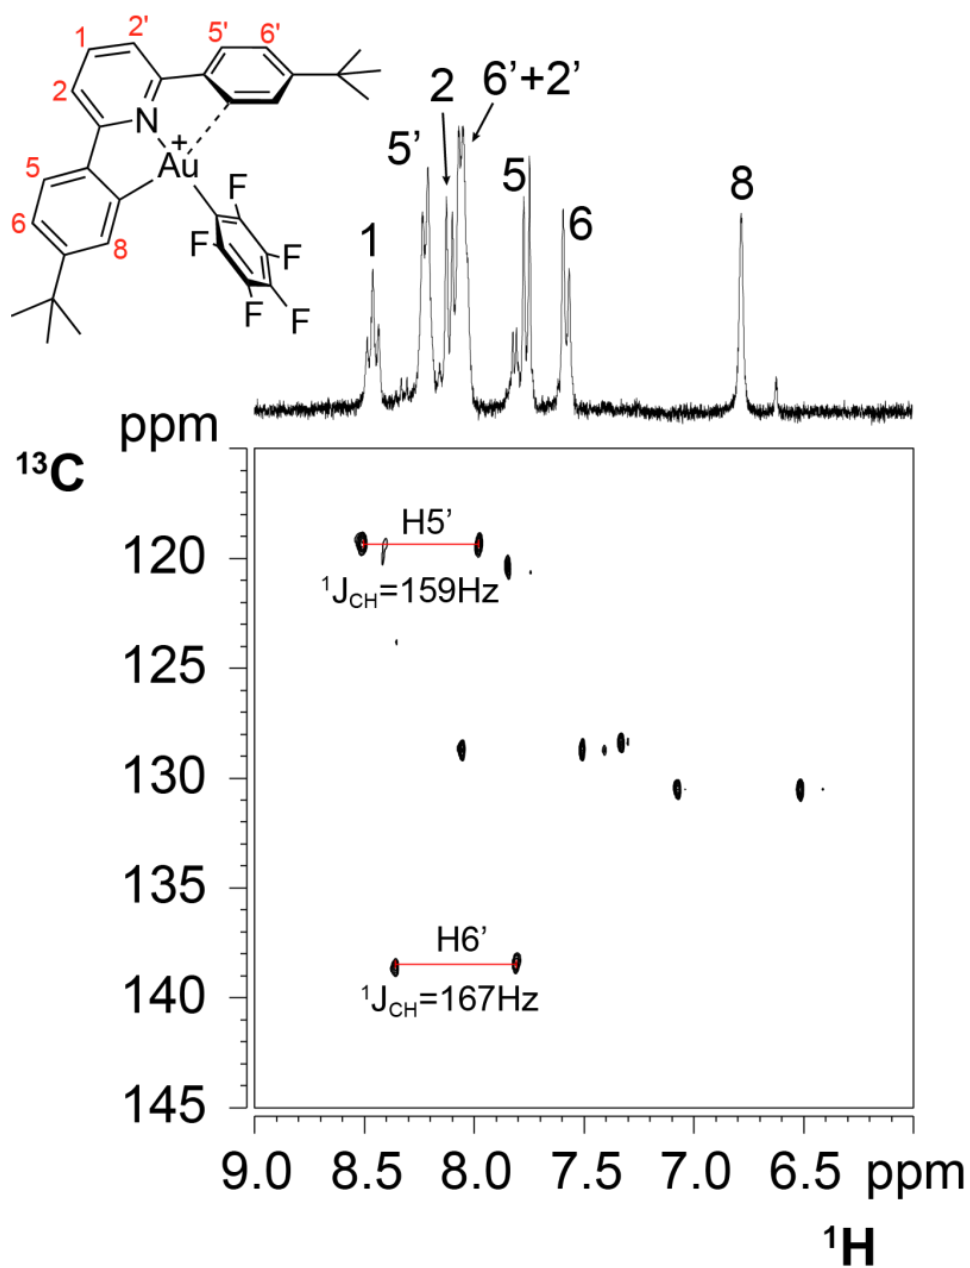

**Figure S8.** A section of the coupled  $^1\text{H}$ ,  $^{13}\text{C}$  HMQC NMR spectrum of complex **2b** obtained after removal of  $\text{Et}_2\text{O}$  ( $\text{CD}_2\text{Cl}_2$ , 297K).

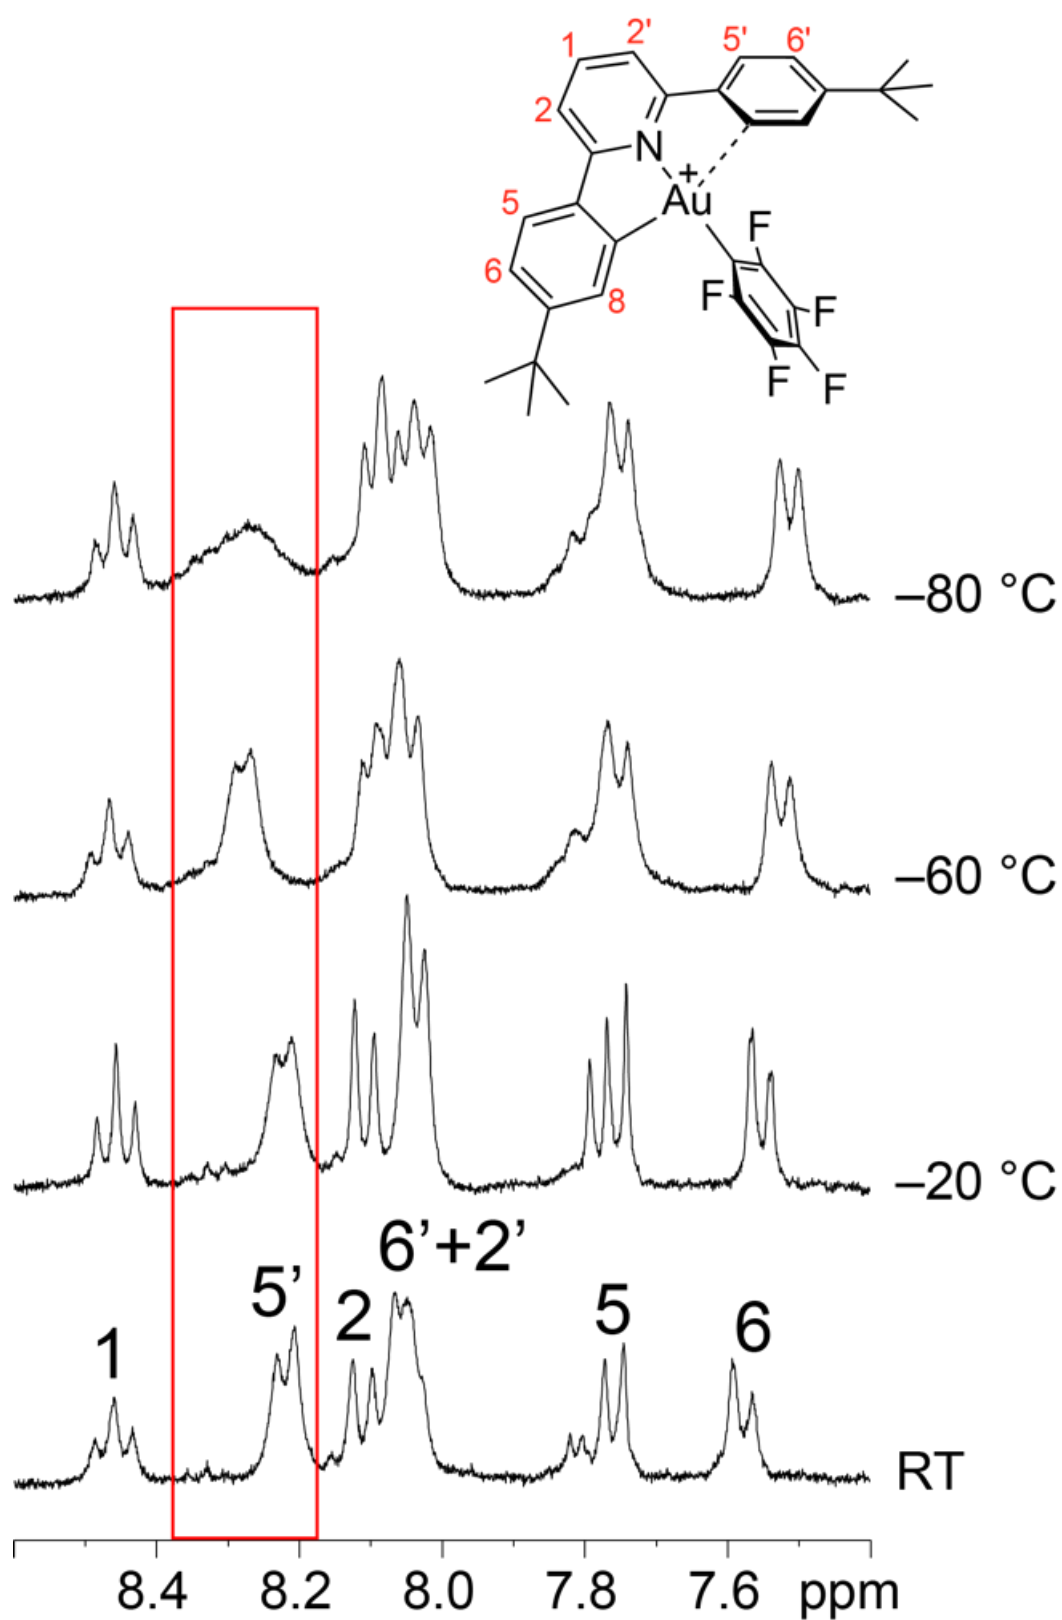

**Figure S9.** Temperature dependence of the aromatic region of the  $^1\text{H}$  NMR spectrum of  $\text{Et}_2\text{O}$ -free **2b** complex ( $\text{CD}_2\text{Cl}_2$ ).

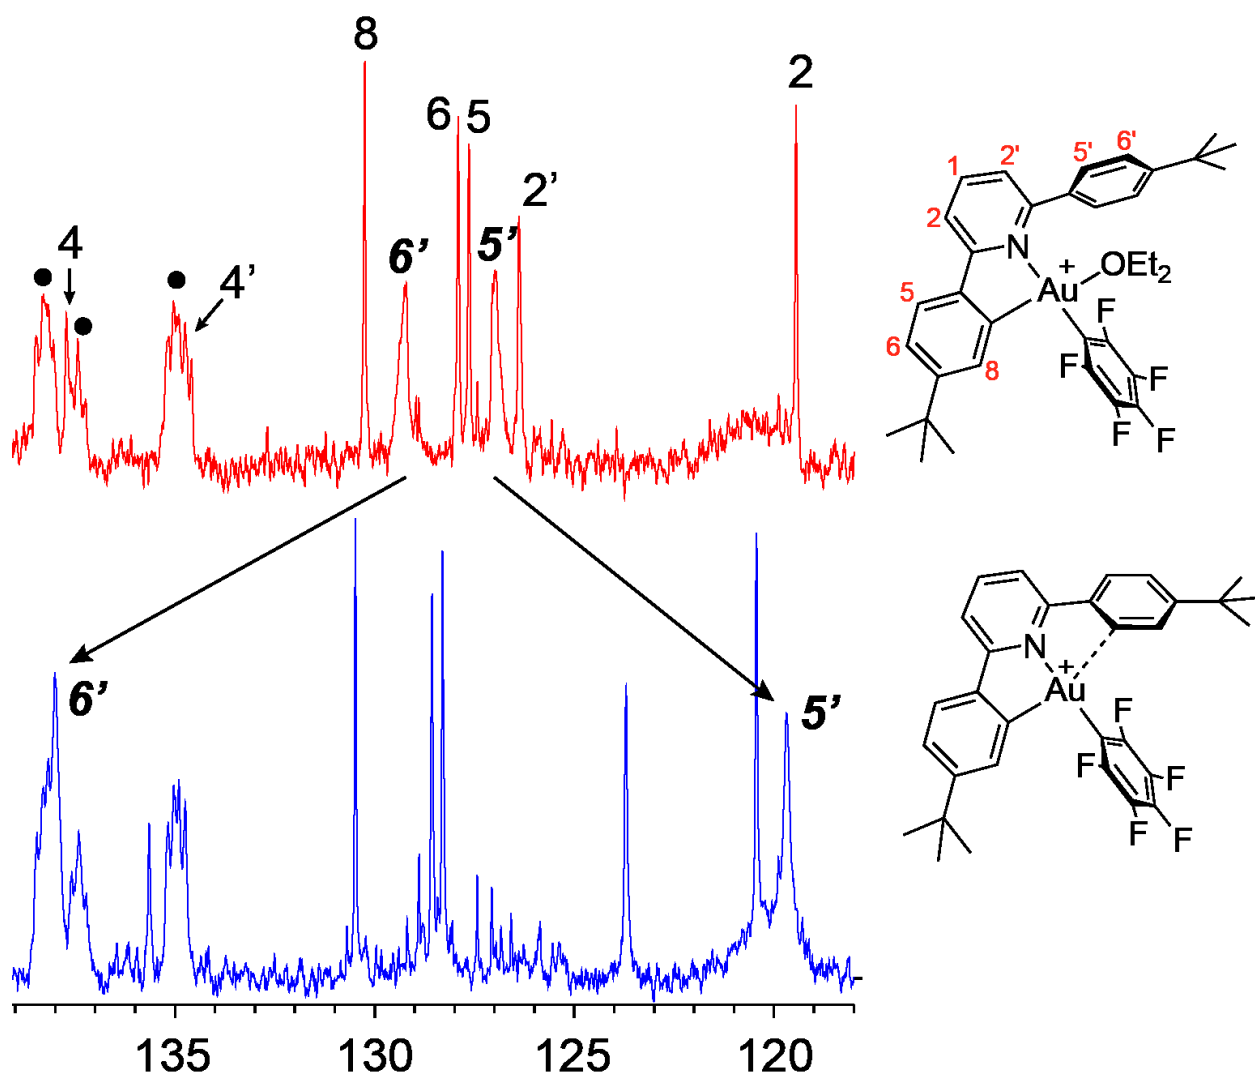

**Figure S10.** Evolution of a section of the  $^{13}\text{C}\{^1\text{H}\}$  NMR spectrum of **2b** upon removal of  $\text{Et}_2\text{O}$  (297 K, methylene chloride- $d_2$ ); black dots indicate C-F signals due to the counterion.

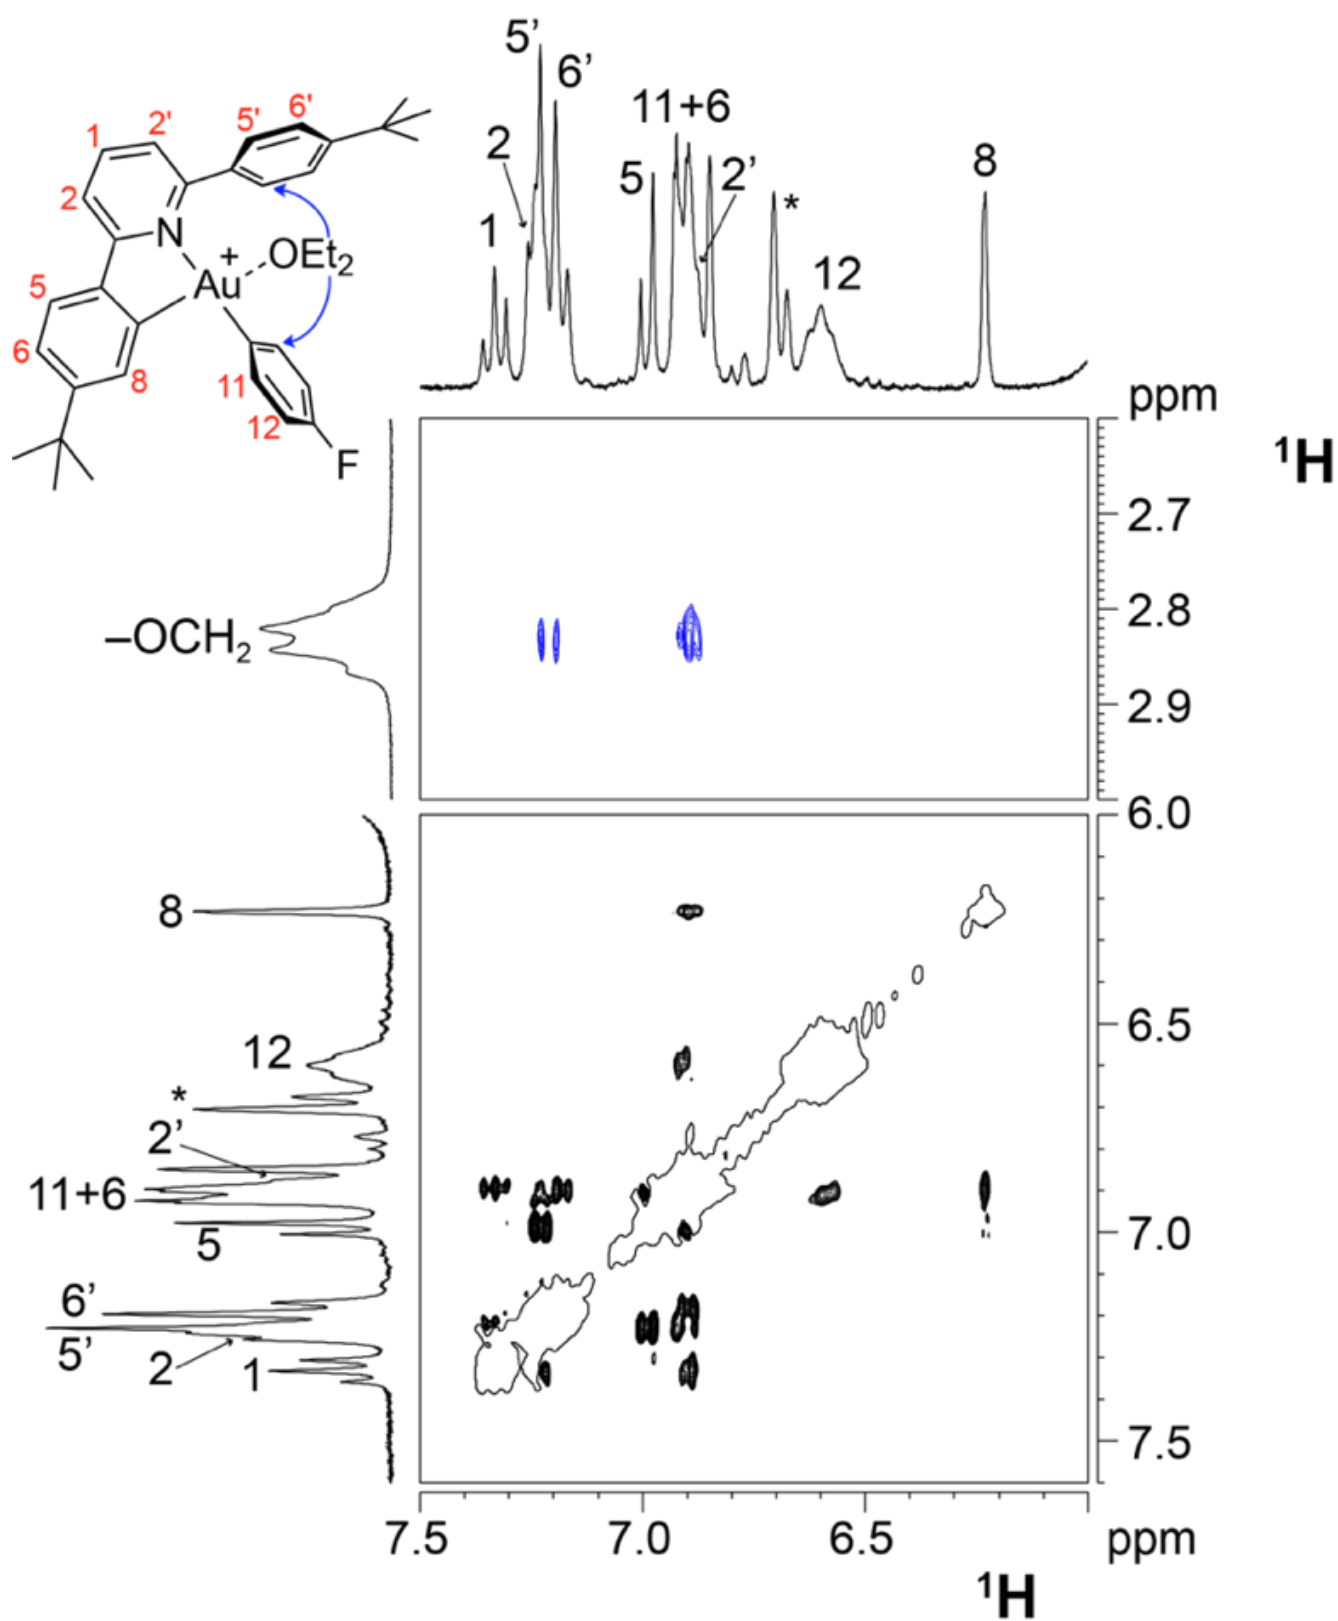

**Figure S11.** Two sections of the  $^1\text{H}$  NOESY spectrum of complex **2c** ( $\tau_M=0.8$  s,  $\text{C}_6\text{D}_5\text{Cl}$ , 297K); asterisks denote residual of protonated solvent.

#### 4. Diffusion NMR experiments

$^1\text{H}$  PGSE measurements were performed by using a double stimulated echo sequence with longitudinal eddy current delay on a Bruker DRX 300 spectrometer equipped with a smartprobe and Z-gradient coil, at 297K without spinning. The obtained intensity ( $I$ ) versus gradient ( $G$ ) data were interpolated as reported elsewhere<sup>4</sup> to estimate hydrodynamic volume values ( $V_{\text{H}}$ ) of **2a** and **2b**.

**2a:**

$V_{\text{H}}^0 \text{H}_2\text{N}[\text{B}(\text{C}_6\text{F}_5)_3]_2^- = 740 \text{ \AA}^3$  (derived from the X-Ray structure of  $\{\text{Na}\}\{\text{H}_2\text{N}[\text{B}(\text{C}_6\text{F}_5)_3]_2\}^3$ )

$V_{\text{H}}^0 \mathbf{2a}^+ = 580 \text{ \AA}^3$  (derived from the DFT-optimized structure)

Approximate  $V_{\text{H}}^0$  of the ion pair =  $1320 \text{ \AA}^3$

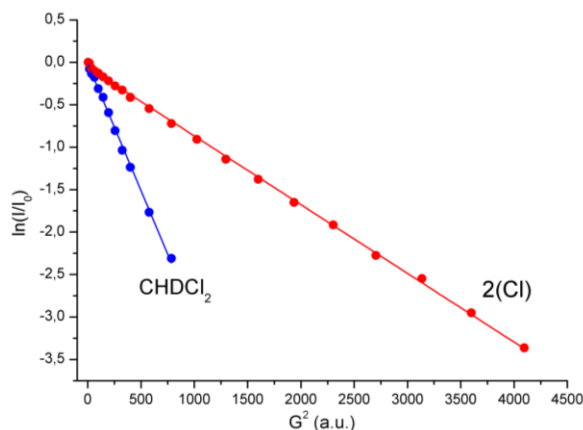

C **2a**=16.2 mM

Slope  $\text{CHDCl}_2 = -2.99 \times 10^{-3}$

Slope **2a** =  $-8.10 \times 10^{-2}$

$r_{\text{H}} \mathbf{2a} = 34.0 \text{ \AA}$

$r_{\text{H}} = 6.19 \text{ \AA}$

$V_{\text{H}} = 993 \text{ \AA}^3$

**Figure S12.**  $\ln(I/I_0)$  vs.  $G^2$  plot obtained for **2a** in  $\text{CD}_2\text{Cl}_2$  at 297 K.

**2b:**

$V_{\text{H}}^0 \text{H}_2\text{N}[\text{B}(\text{C}_6\text{F}_5)_3]_2^- = 740 \text{ \AA}^3$  (derived from the X-Ray structure of  $\{\text{Na}\}\{\text{H}_2\text{N}[\text{B}(\text{C}_6\text{F}_5)_3]_2\}$ )

$V_{\text{H}}^0 \mathbf{2b}^+ = 670 \text{ \AA}^3$  (derived from the DFT-optimized structure)

Approximate  $V_{\text{H}}^0$  of the ion pair =  $1410 \text{ \AA}^3$

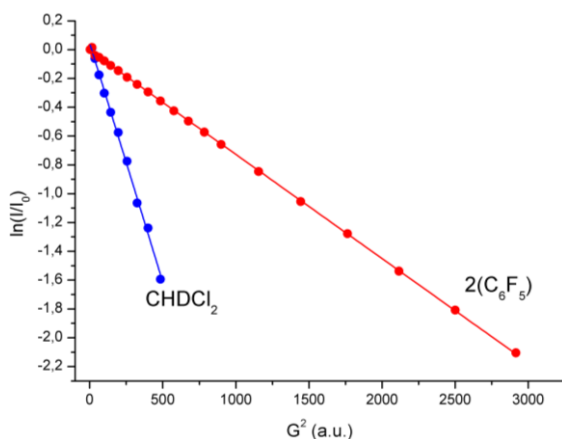

C **2b**=27.0 mM

Slope  $\text{CHDCl}_2 = -3.32 \times 10^{-3}$

Slope **2b** =  $-7.23 \times 10^{-2}$

$r_{\text{H}} \mathbf{2b} = 42.0 \text{ \AA}$

$r_{\text{H}} = 7.43 \text{ \AA}$

$V_{\text{H}} = 1720 \text{ \AA}^3$

**Figure S13.**  $\ln(I/I_0)$  vs.  $G^2$  plot obtained for **2b** in  $\text{CD}_2\text{Cl}_2$  at 297 K.

4) (a) Macchioni, A.; Ciancaleoni, G.; Zuccaccia, C.; Zuccaccia, C. *Chem. Soc. Rev.* **2008**, *37*, 479. (b) Zuccaccia, D.; Macchioni, A. *Organometallics* **2005**, *24*, 3476.

## 5. EXSY NMR Measurements

Two-dimensional  $^1\text{H}$  EXSY measurements were performed by using the *pfg* version of the standard  $^1\text{H}$  NOESY sequence (noesygptp). Different values of spectral width, relaxation delay, number of transients and mixing time were used according to the sample concentration and temperature. Microscopic first-order rate constant ( $k_1$ ,  $\text{s}^{-1}$ ) at different mixing time values ( $\tau_M$ , s) were obtained by integration of diagonal ( $I_{AA}$ ,  $I_{BB}$ ) and cross ( $I_{AB}$ ,  $I_{BA}$ ) peaks relative to the exchanging signals and applying the following relationship:

$$k_1 = \frac{1}{\tau_M} \ln \frac{r+1}{r-1}$$

where  $r=(I_{AA}+I_{BB})/(I_{AB}+I_{BA})$ .<sup>5</sup> At least two experiments with different  $\tau_M$  were acquired and the rate constants were obtained as the average of all the values. Linearity of  $\ln(r+1)/(r-1)$  versus  $\tau_M$  has been verified at 298 and 312 K, where more data points were acquired.

**Table S1.** Microscopic rate constants obtained for the chemical exchange in complex **2a** at different temperatures (T) and mixing time values ( $\tau_M$ ).

| $\tau_M$ (s) | $k_1(\text{s}^{-1})$ | $\overline{k_1}(\text{s}^{-1})$ |
|--------------|----------------------|---------------------------------|
| T = 298.65 K |                      |                                 |
| 1.4          | 0.48                 |                                 |
| 1.2          | 0.49                 |                                 |
| 1.0          | 0.48                 |                                 |
| 0.8          | 0.57                 | 0.51±0.05                       |
| T = 312.45 K |                      |                                 |
| 0.9          | 0.99                 |                                 |
| 0.8          | 1.06                 |                                 |
| 0.7          | 1.09                 |                                 |
| 0.55         | 1.16                 |                                 |
| 0.4          | 1.28                 | 1.11±0.10                       |
| T = 323.45 K |                      |                                 |
| 0.5          | 2.35                 |                                 |
| 0.4          | 2.24                 |                                 |
| 0.3          | 2.28                 | 2.29±0.06                       |
| T = 333.75 K |                      |                                 |
| 0.4          | 4.16                 |                                 |
| 0.3          | 4.24                 | 4.20±0.05                       |
| T = 344.15 K |                      |                                 |
| 0.2          | 6.75                 |                                 |
| 0.1          | 6.48                 | 6.62±0.18                       |

5) C. K. Perrin, T. J. Dwyer, *Chem. Rev.* 1990, **90**, 935.

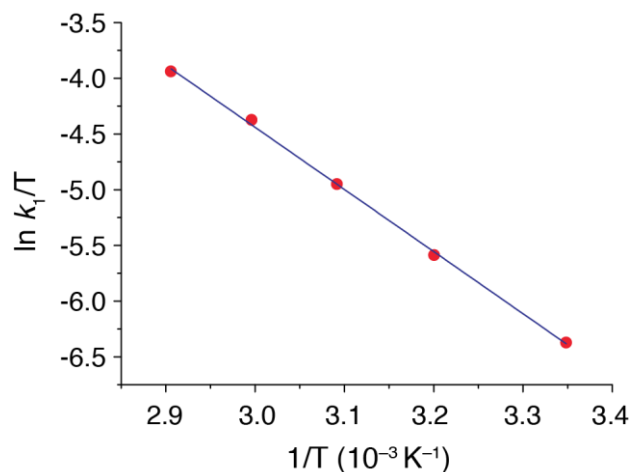

**Figure S14.** Eyring plot for the reversible protodeauration of **1a** in C<sub>6</sub>D<sub>5</sub>Cl. Linear fitting gave a  $\Delta H^\ddagger=(11.0\pm 0.2)$  kcal/mol and  $\Delta S^\ddagger=(-23.0\pm 1.0)$  cal mol<sup>-1</sup> K<sup>-1</sup>.

**Table S2.** Microscopic rate constants obtained for the chemical exchange in complex **2b** at different temperatures (T) and mixing time values ( $\tau_M$ ).

| $\tau_M$ (s) | $k_1(\text{s}^{-1})$ | $\overline{k_1}(\text{s}^{-1})$ |
|--------------|----------------------|---------------------------------|
| T = 298.65 K |                      |                                 |
| 1.6          | 0.20                 |                                 |
| 1.3          | 0.14                 |                                 |
| 1.0          | 0.14                 | 0.16±0.03                       |
| T = 323.45 K |                      |                                 |
| 0.6          | 1.27                 |                                 |
| 0.5          | 1.22                 |                                 |
| 0.4          | 1.27                 | 1.25±0.03                       |
| T = 344.15 K |                      |                                 |
| 0.15         | 5.75                 |                                 |
| 0.1          | 6.29                 | 6.02±0.38                       |



## 6 – Details of computations

All calculations were carried out with Gaussian 09.<sup>6</sup> Structures were optimized at the B3LYP<sup>7</sup>/SVP<sup>8</sup> level (LANL2DZ with corresponding ECP at Au<sup>9</sup>) including a PCM(ChloroBenzene) solvent correction.<sup>10</sup> The nature of stationary points was checked by vibrational analyses. Improved single-point energies were obtained with TPSSH<sup>11</sup>/cc-pVTZ<sup>12</sup> including a PCM(ChloroBenzene) correction. These were combined with a DFT-D3 dispersion correction<sup>13</sup> and with the thermal corrections (enthalpy and entropy) at 323 K, obtained from the B3LYP/SVP vibrational analyses; entropy contributions were scaled by 0.67 to account for reduced freedom in the condensed phase.<sup>14</sup> Figure S15 (below) shows structures and relevant bond lengths for stationary points along the path for protonation of (C<sup>^N^C</sup>)AuCl (model ligand not bearing *t*Bu substituents) with H(OMe)<sub>2</sub><sup>+</sup> (model for H(OEt)<sub>2</sub><sup>+</sup>). Chemical shifts were calculated using the GIAO method<sup>15</sup> at the TPSSH/cc-pVTZ level, using Me<sub>4</sub>Si as reference for <sup>1</sup>H and <sup>13</sup>C, and CFCl<sub>3</sub> for <sup>19</sup>F; calculated chemical shifts for (C<sup>^N^CH</sup>)Au(C<sub>6</sub>F<sub>5</sub>)<sup>+</sup> species are collected in Figure S16. Table S3 contains total energies and thermal corrections for all species studied; an xyz archive containing all relevant coordinates is provided separately.

---

<sup>6</sup> Frisch, M. J.; Trucks, G. W.; Schlegel, H. B.; Scuseria, G. E.; Cheeseman, J. R.; Scalmani, G.; Barone, V.; Mennucci, B.; Petersson, G. A.; Nakatsuji, H.; Caricato, M.; Li, X.; Hratchian, H. P.; Izmaylov, A. F.; Bloino, J.; Zheng, G.; Sonnenberg, J. L.; Hada, M.; Ehara, M.; Toyota, K.; Fukuda, R.; Hasegawa, J.; Ishida, M.; Nakajima, T.; Honda, Y.; Kitao, O.; Nakai, H.; Vreven, T.; Montgomery, J. A. J.; Peralta, J. E.; Ogliaro, F.; Bearpark, M.; Heyd, J. J.; Brothers, E.; Kudin, K. N.; Staroverov, V. N.; Kobayashi, R.; Normand, J.; Raghavachari, K.; Rendell, A.; Burant, J. C.; Iyengar, S. S.; Tomasi, J.; Cossi, M.; Rega, N.; Millam, J. M.; Klene, M.; Knox, J. E.; Cross, J. B.; Bakken, V.; Adamo, C.; Jaramillo, J.; Gomperts, R.; Stratmann, R. E.; Yazyev, O.; Austin, A. J.; Cammi, R.; Pomelli, C.; Ochterski, J. W.; Martin, R. L.; Morokuma, K.; Zakrzewski, V. G.; Voth, G. A.; Salvador, P.; Dannenberg, J. J.; Dapprich, S.; Daniels, A. D.; Farkas, O.; Foresman, J. B.; Ortiz, J. V.; Ciolowski, J.; Fox, D. J. *Gaussian 09*, B.01; Gaussian, Inc.: Wallingford CT, 2009.

<sup>7</sup> (a) Becke, A. D., *J. Chem. Phys.* **1993**, *98*, 1372-1377; (b) Becke, A. D., *J. Chem. Phys.* **1993**, *98*, 5648-5652; (c) Lee, C. T.; Yang, W. T.; Parr, R. G., *Phys. Rev. B* **1988**, *37*, 785-789.

<sup>8</sup> Schäfer, A.; Horn, H.; Ahlrichs, R., *J. Chem. Phys.* **1992**, *97*, 2571-2577.

<sup>9</sup> Hay, P. J.; Wadt, W. R., *J. Chem. Phys.* **1985**, *82*, 299-310

<sup>10</sup> (a) Miertus, S.; Scrocco, E.; Tomasi, J., *Chem. Phys.* **1981**, *55*, 117-129; (b) Miertus, S.; Tomasi, J., *Chem. Phys.* **1982**, *65*, 239-245; (c) Tomasi, J.; Mennucci, B.; Cammi, R., *Chem. Rev.* **2005**, *105*, 2999-3093; (d) Scalmani, G.; Frisch, M. J., *J. Chem. Phys.* **2010**, *132*

<sup>11</sup> Tao, J. M.; Perdew, J. P.; Staroverov, V. N.; Scuseria, G. E., *Phys. Rev. Lett.* **2003**, *91*, 146401

<sup>12</sup> (a) Dunning, T. H., *J. Chem. Phys.* **1989**, *90*, 1007-1023; (b) Woon, D. E.; Dunning, T. H., *J. Chem. Phys.* **1993**, *98*, 1358-1371; (c) Peterson, K. A.; Puzzarini, C., *Theor. Chem. Acc.* **2005**, *114*, 283-296

<sup>13</sup> Grimme, S.; Antony, J.; Ehrlich, S.; Krieg, H., *J. Chem. Phys.* **2010**, *132*, 154104

<sup>14</sup> (a) Tobisch, S.; Ziegler, T., *J. Am. Chem. Soc.* **2004**, *126*, 9059-9071; (b) Raucoules, R.; de Bruin, T.; Raybaud, P.; Adamo, C., *Organometallics* **2009**, *28*, 5358-5367

<sup>15</sup> Ditchfield, R., *Mol. Phys.* **1974**, *27*, 789-807; (b) Wolinski, K.; Hinton, J. F.; Pulay, P., *J. Am. Chem. Soc.* **1990**, *112*, 8251-8260

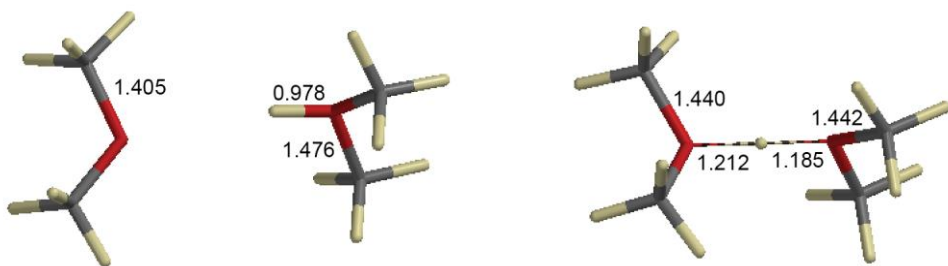

OMe2, H+\_OMe2, H+\_OMe2\_2

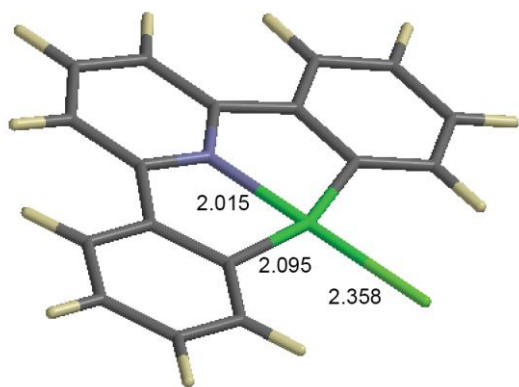

L(AuCl)

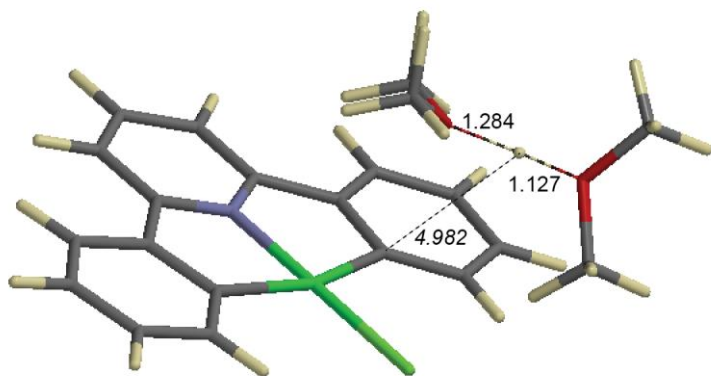

L(AuCl)\_H+\_OMe2\_2

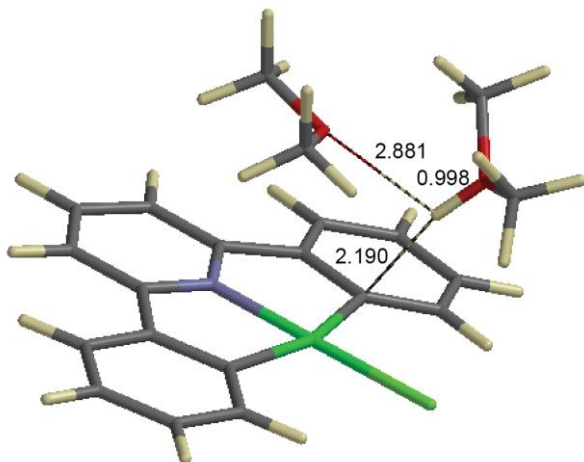

L(AuCl)\_H+\_OMe2\_2\_TS

**Figure S15.** Calculated stationary points along the path for protonation of  $(C^N^C)AuCl$  by  $H(OMe)_2^+$ . Bond lengths in Å.

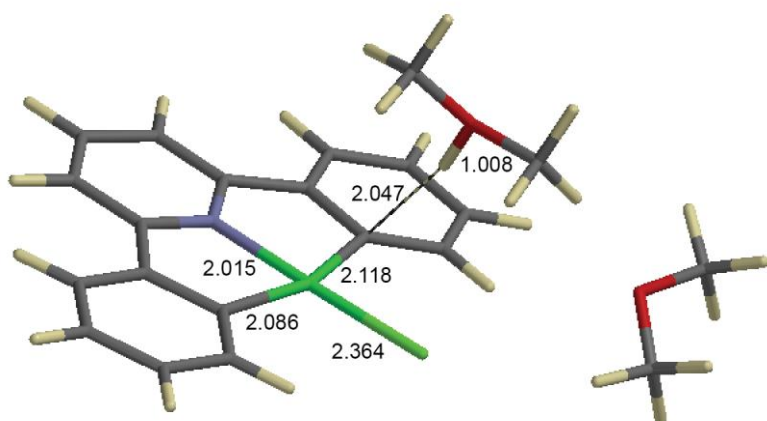

L[AuCl]·H<sup>+</sup>·OMe<sub>2</sub>·OMe<sub>2</sub>

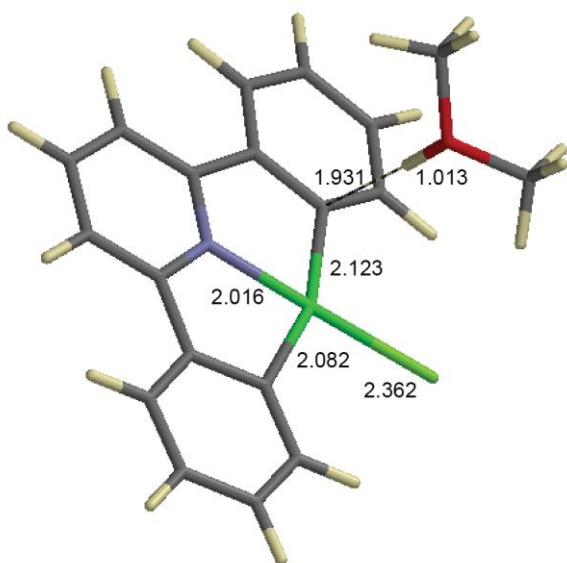

L[AuCl]·H<sup>+</sup>·OMe<sub>2</sub>

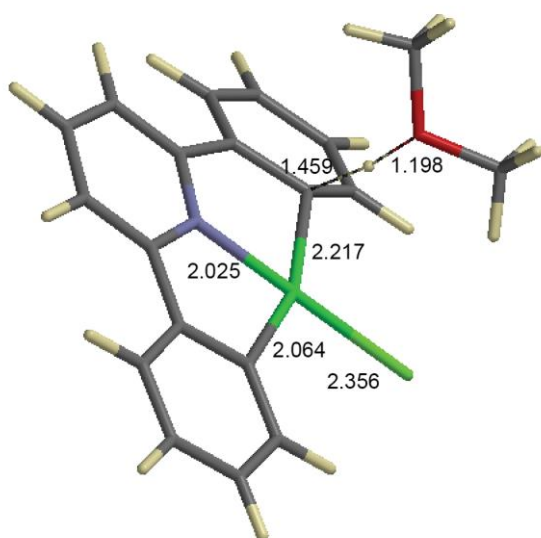

L[AuCl]·H<sup>+</sup>·OMe<sub>2</sub>·TS

**Figure S15 (cont'd).** Calculated stationary points along the path for protonation of (C<sup>^</sup>N<sup>^</sup>C)AuCl by H(OMe<sub>2</sub>)<sub>2</sub><sup>+</sup>. Bond lengths in Å.

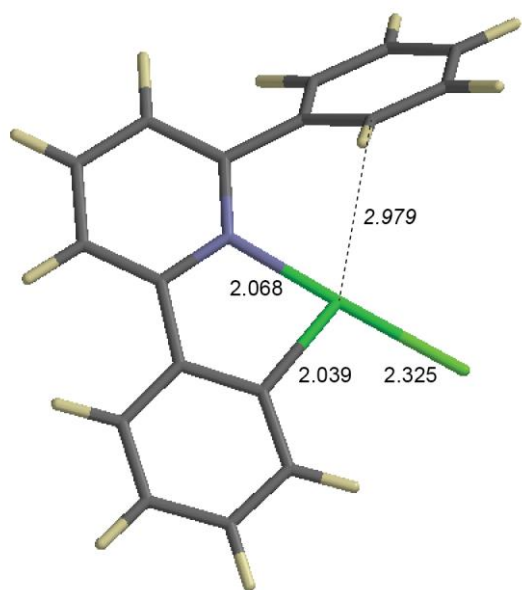

LHAu+\_Cl

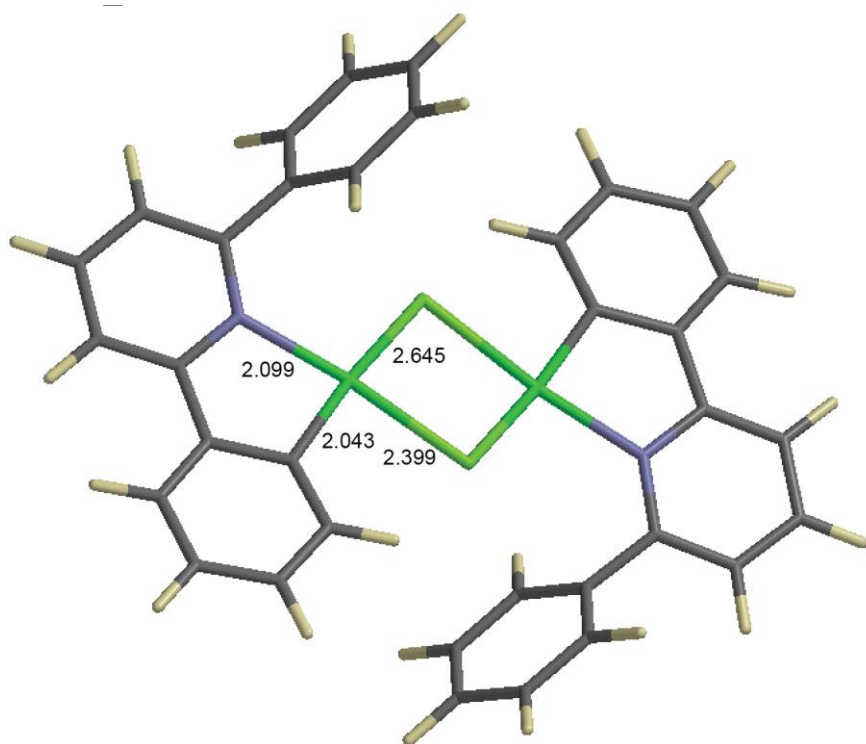

LHAuCl\_2\_2+

**Figure S15 (cont'd).** Calculated stationary points along the path for protonation of  $(C^{\wedge}N^{\wedge}C)AuCl$  by  $H(OMe_2)_2^+$ . Bond lengths in Å.

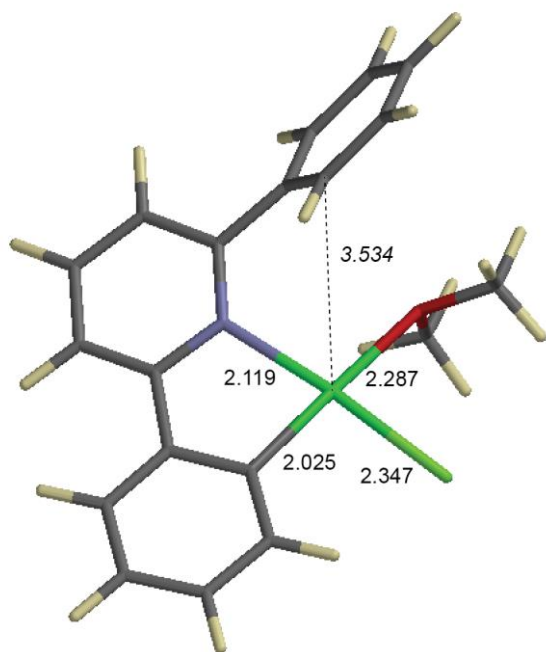

LHAu+\_Cl\_OMe2

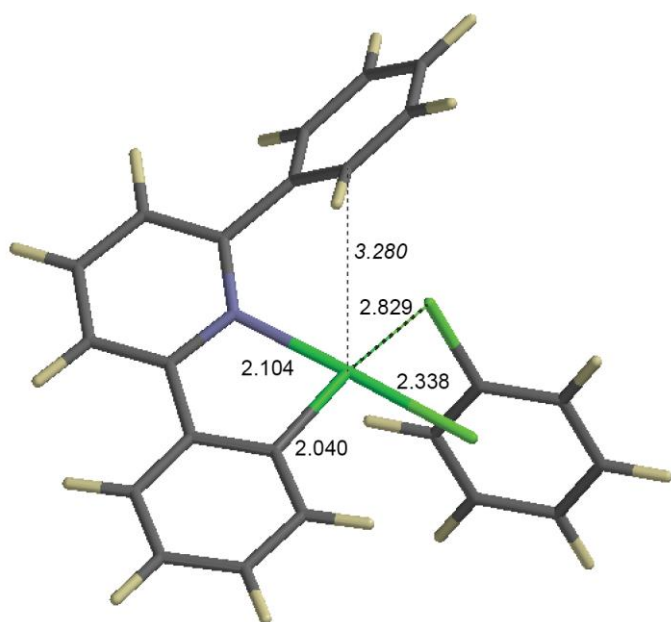

LHAu+\_Cl\_ClPh

**Figure S15 (cont'd).** Calculated stationary points along the path for protonation of  $(C^{\wedge}N^{\wedge}C)AuCl$  by  $H(OMe_2)_2^+$ . Bond lengths in Å.

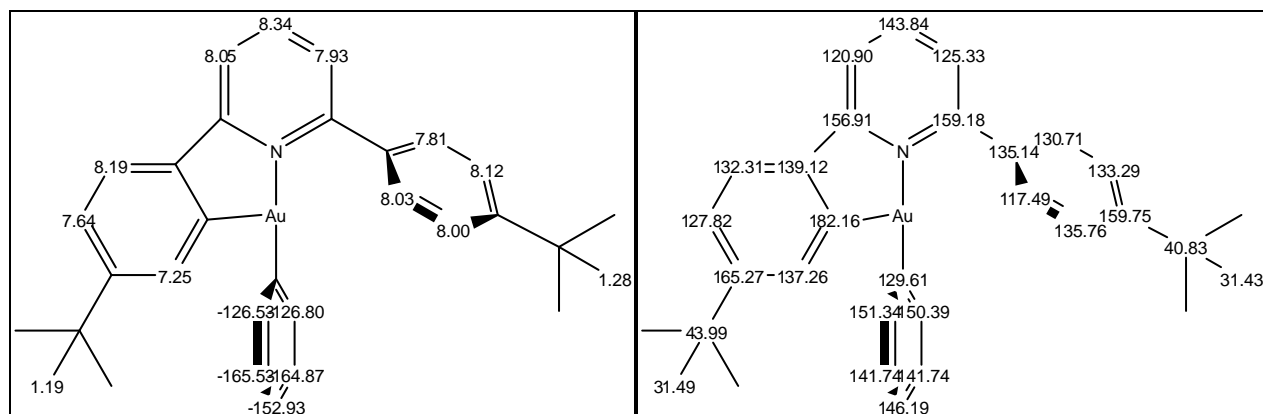

$(C^N^CH)Au(C_6F_5)^+$

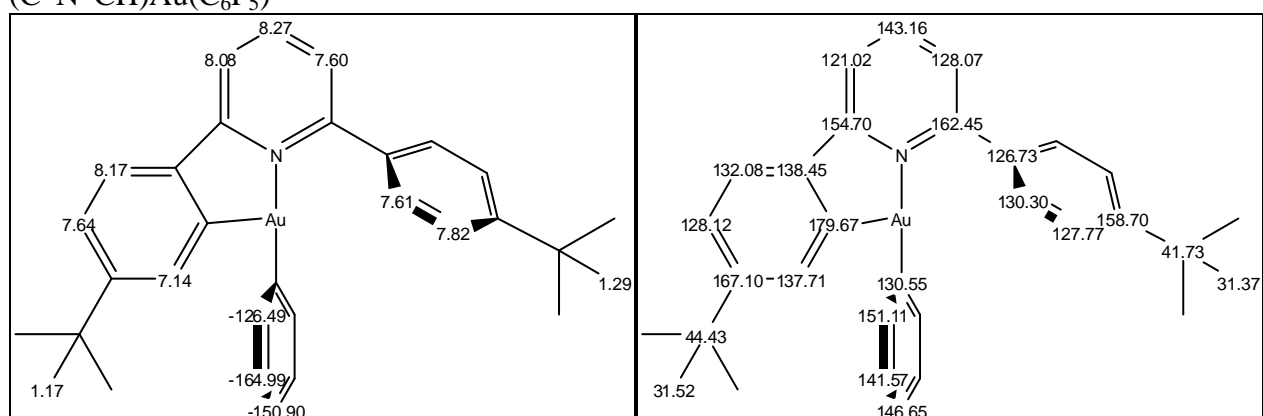

$(C^N^CH)Au(C_6F_5)^+$  TS with perpendicular  $C_6H_4tBu$  group

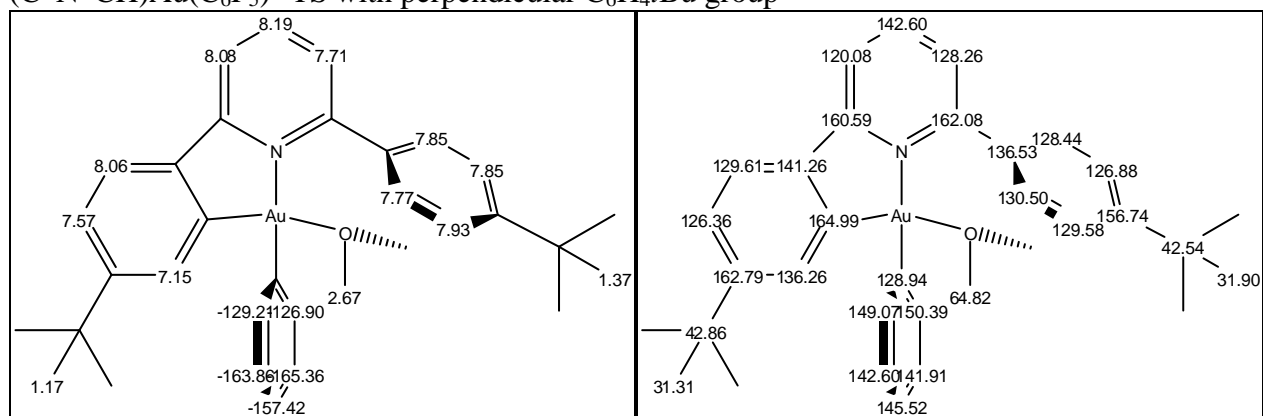

$(C^N^CH)Au(C_6F_5)(OMe_2)^+$

Figure S16. Calculated  $^{13}C$  (left) and  $^1H$  and  $^{19}F$  (right) chemical shifts for  $(C^N-CH)Au(C_6F_5)^+$  species.

**Table S3. Total energies and thermal corrections.**

| Name                     | Formula        | E <sub>elec</sub><br>B3LYP | ΔH <sub>corr</sub><br>323 K | TΔS <sub>corr</sub><br>323 K | E <sub>elec</sub><br>TPSSH | DFTD3    | G           | on scale    | rel<br>kcal/mol |
|--------------------------|----------------|----------------------------|-----------------------------|------------------------------|----------------------------|----------|-------------|-------------|-----------------|
| TMS                      | C4H12Si        | -449.00327                 | 0.15764                     | 0.04780                      | -449.29532                 | -0.00692 | -449.17664  |             |                 |
| OMe2                     | C2H6O          | -154.91169                 | 0.08508                     | 0.03309                      | -155.09304                 | -0.00250 | -155.03263  |             |                 |
| H+_OMe2                  | C2H7O          | -155.30356                 | 0.09925                     | 0.03517                      | -155.48704                 | -0.00324 | -155.41459  |             |                 |
| H+_OMe2_2                | C4H13O2        | -310.25180                 | 0.18366                     | 0.05216                      | -310.61118                 | -0.01008 | -310.47255  |             |                 |
| OEt2                     | C4H10O         | -233.49343                 | 0.14445                     | 0.04137                      | -233.76290                 | -0.00616 | -233.65233  |             |                 |
| H+_OEt2                  | C4H11O         | -233.88991                 | 0.15834                     | 0.04356                      | -234.16266                 | -0.00737 | -234.04088  |             |                 |
| H+_OEt2_2                | C8H21O2        | -467.41383                 | 0.30360                     | 0.06451                      | -467.95002                 | -0.02398 | -467.71361  |             |                 |
| PhH                      | C6H6           | -232.08645                 | 0.10661                     | 0.03633                      | -232.34665                 | -0.00419 | -232.26858  |             |                 |
| CIPh                     | C6H5Cl         | -691.55304                 | 0.09835                     | 0.03947                      | -691.98175                 | -0.00573 | -691.91558  |             |                 |
| LAuCl {+ H+_OMe2_2}      | C17H11AuClN    | -1304.24069                | 0.25044                     | 0.06753                      | -1305.45387                | -0.02818 | -1305.27685 | -1305.27685 | 8.68            |
| LAuCl_H+_OMe2_2          | C21H24AuClNO2  | -1614.49938                | 0.43734                     | 0.10117                      | -1616.06852                | -0.04609 | -1615.74505 | -1305.27250 | 11.41           |
| LAuCl_H+_OMe2_2_TS       | C21H24AuClNO2  | -1614.47818                | 0.43807                     | 0.09850                      | -1616.04795                | -0.05626 | -1615.73214 | -1305.25959 | 19.51           |
| LAuCl_H+_OMe2__OMe2      | C21H24AuClNO2  | -1614.48061                | 0.43889                     | 0.10275                      | -1616.05036                | -0.05111 | -1615.73142 | -1305.25887 | 19.97           |
| LAuCl {+ H+_OMe2 + OMe2} | C17H11AuClN    | -1304.24069                | 0.25044                     | 0.06753                      | -1305.45387                | -0.02818 | -1305.27685 | -1305.25152 | 24.58           |
| LAuCl_H+_OMe2            | C19H18AuClNO   | -1459.56067                | 0.35114                     | 0.08466                      | -1460.95323                | -0.04208 | -1460.70089 | -1305.26097 | 18.65           |
| LAuCl_H+_OMe2_TS         | C19H18AuClNO   | -1459.55580                | 0.34539                     | 0.08223                      | -1460.94740                | -0.04256 | -1460.69966 | -1305.25975 | 19.42           |
| LHAu+_Cl                 | C17H12AuClN    | -1304.66472                | 0.26267                     | 0.07223                      | -1305.87230                | -0.02935 | -1305.68737 | -1305.28008 | 6.65            |
| LHAu+_Cl_CIPh            | C23H17AuCl2N   | -1996.22037                | 0.36321                     | 0.09378                      | -1997.85275                | -0.04569 | -1997.59807 | -1305.27520 | 9.72            |
| LHAuCl_2_2+              | C34H24Au2Cl2N2 | -2609.33283                | 0.52757                     | 0.12131                      | -2611.74508                | -0.07652 | -2611.37531 | -1305.28037 | 6.48            |
| LHAu+_Cl_OMe2            | C19H18AuClNO   | -1459.59489                | 0.35096                     | 0.08454                      | -1460.98016                | -0.04477 | -1460.73060 | -1305.29069 | 0.00            |
| LAuCl                    | C17H11AuClN    | -1304.24069                | 0.25044                     | 0.06753                      | -1305.45387                | -0.02818 | -1305.27685 | -1305.27685 | 5.06            |
| LAuCl_H+_OEt2            | C21H22AuClNO   | -1538.14355                | 0.41061                     | 0.09280                      | -1539.62495                | -0.04843 | -1539.32494 | -1305.26366 | 13.34           |
| LAuCl_H+_OEt2_TS         | C21H22AuClNO   | -1538.13543                | 0.40462                     | 0.09050                      | -1539.61536                | -0.05006 | -1539.32144 | -1305.26015 | 15.53           |
| LHAu+_Cl                 | C17H12AuClN    | -1304.66472                | 0.26267                     | 0.07223                      | -1305.87230                | -0.02935 | -1305.68737 | -1305.27841 | 4.08            |
| LHAu+_Cl_CIPh            | C23H17AuCl2N   | -1996.22037                | 0.36321                     | 0.09378                      | -1997.85275                | -0.04569 | -1997.59807 | -1305.27353 | 7.14            |
| LHAuCl_2_2+              | C34H24Au2Cl2N2 | -2609.33283                | 0.52757                     | 0.12131                      | -2611.74508                | -0.07652 | -2611.37531 | -1305.27869 | 3.90            |
| LHAu+_Cl_OEt2            | C21H22AuClNO   | -1538.16861                | 0.41052                     | 0.09071                      | -1539.64171                | -0.05423 | -1539.34620 | -1305.28491 | 0.00            |
| LbAuCl                   | C25H27AuClN    | -1618.52246                | 0.48634                     | 0.09586                      | -1620.09296                | -0.05421 | -1619.72506 | -1619.72506 | 9.86            |

| Name                | Formula        | E <sub>elec</sub><br>B3LYP | ΔH <sub>corr</sub><br>323 K | TΔS <sub>corr</sub><br>323 K | E <sub>elec</sub><br>TPSSH | DFTD3    | G           | on scale    | rel<br>kcal/mol |
|---------------------|----------------|----------------------------|-----------------------------|------------------------------|----------------------------|----------|-------------|-------------|-----------------|
| LbAuCl__H+_OMe2     | C27H34AuClNO   | -1773.84355                | 0.58715                     | 0.11131                      | -1775.59341                | -0.06974 | -1775.15058 | -1619.71066 | 18.89           |
| LbAuCl_H+_OMe2_TS   | C27H34AuClNO   | -1773.83926                | 0.58122                     | 0.11077                      | -1775.58827                | -0.06951 | -1775.15078 | -1619.71086 | 18.77           |
| LbHAu+_Cl           | C25H28AuClN    | -1618.94930                | 0.49856                     | 0.10079                      | -1620.51478                | -0.05540 | -1620.13916 | -1619.73187 | 5.58            |
| LbHAuCl_2_2+        | C50H56Au2Cl2N2 | -3237.89860                | 0.99923                     | 0.17310                      | -3241.02550                | -0.13455 | -3240.27679 | -1619.73111 | 6.06            |
| LbHAu+_Cl_OMe2      | C27H34AuClNO   | -1773.87810                | 0.58683                     | 0.11263                      | -1775.62072                | -0.07133 | -1775.18068 | -1619.74077 | 0.00            |
| LbAuCl              | C25H27AuClN    | -1618.52246                | 0.48634                     | 0.09586                      | -1620.09296                | -0.05421 | -1619.72506 | -1619.72506 | 6.74            |
| LbAuCl__H+_OEt2     | C29H38AuClNO   | -1852.42641                | 0.64684                     | 0.11775                      | -1854.26507                | -0.07662 | -1853.77374 | -1619.71245 | 14.65           |
| LbAuCl_H+_OEt2_TS   | C29H38AuClNO   | -1852.41888                | 0.64046                     | 0.11886                      | -1854.25621                | -0.07704 | -1853.77242 | -1619.71114 | 15.48           |
| LbHAu+_Cl           | C25H28AuClN    | -1618.94930                | 0.49856                     | 0.10079                      | -1620.51478                | -0.05540 | -1620.13916 | -1619.73019 | 3.52            |
| LbHAuCl_2_2+        | C50H56Au2Cl2N2 | -3237.89860                | 0.99923                     | 0.17310                      | -3241.02550                | -0.13455 | -3240.27679 | -1619.72943 | 4.00            |
| LbHAu+_Cl_OEt2      | C29H38AuClNO   | -1852.45187                | 0.64633                     | 0.11936                      | -1854.28240                | -0.08104 | -1853.79709 | -1619.73580 | 0.00            |
| LAuI                | C17H11AuIN     | -855.56462                 | 0.25022                     | 0.07019                      | -1140.84533                | -0.03004 | -1140.67217 | -1140.67217 | 6.87            |
| LAuI__H+_OMe2       | C19H18AuINO    | -1010.88210                | 0.35098                     | 0.08642                      | -1296.34448                | -0.04418 | -1296.09558 | -1140.65566 | 17.23           |
| LAuI_H+_OMe2_TS     | C19H18AuINO    | -1010.87708                | 0.34493                     | 0.08537                      | -1296.33806                | -0.04472 | -1296.09505 | -1140.65513 | 17.56           |
| LHAu+_I             | C17H12AuIN     | -855.98727                 | 0.26242                     | 0.07443                      | -1141.26333                | -0.03084 | -1141.08161 | -1140.67433 | 5.51            |
| LHAuI_2_2+          | C34H24Au2I2N2  | -1711.96753                | 0.52648                     | 0.12429                      | -2282.53169                | -0.08093 | -2282.16940 | -1140.67742 | 3.58            |
| LHAu+_I_OMe2        | C19H18AuINO    | -1010.91607                | 0.35101                     | 0.08518                      | -1296.37010                | -0.04687 | -1296.12303 | -1140.68312 | 0.00            |
| LAuPh               | C23H16AuN      | -1075.62034                | 0.34353                     | 0.07793                      | -1076.92246                | -0.03759 | -1076.66874 | -1076.66874 | 15.64           |
| LAuPh__H+_OMe2      | C25H23AuNO     | -1230.94059                | 0.44384                     | 0.09594                      | -1232.42358                | -0.05311 | -1232.09714 | -1076.65722 | 22.87           |
| LAuPh_H+_OMe2_TS    | C25H23AuNO     | -1230.93799                | 0.43890                     | 0.09284                      | -1232.41953                | -0.05345 | -1232.09629 | -1076.65637 | 23.40           |
| LHAu+_Ph            | C23H17AuN      | -1076.05491                | 0.35614                     | 0.08211                      | -1077.34953                | -0.03762 | -1077.08602 | -1076.67873 | 9.37            |
| LHAu+_Ph_OMe2       | C25H23AuNO     | -1230.98721                | 0.44465                     | 0.09455                      | -1232.45980                | -0.05508 | -1232.13358 | -1076.69367 | 0.00            |
| LAuPh_H+_OMe2_phTS  | C25H23AuNO     | -1230.92519                | 0.43850                     | 0.09195                      | -1232.40858                | -0.05374 | -1232.08543 | -1076.64551 | 30.22           |
| LAu+_PhH            | C23H17AuN      | -1076.02438                | 0.35639                     | 0.08044                      | -1077.33173                | -0.04116 | -1077.07040 | -1076.66312 | 19.17           |
| LAuC6H4F            | C23H15AuFN     | -1174.78003                | 0.33639                     | 0.08012                      | -1176.19497                | -0.03813 | -1175.95040 | -1175.95040 | 15.15           |
| LAuC6H4F__H+_OMe2   | C25H22AuFNO    | -1330.09949                | 0.43703                     | 0.09596                      | -1331.69526                | -0.05340 | -1331.37593 | -1175.93601 | 24.18           |
| LAuC6H4F_H+_OMe2_TS | C25H22AuFNO    | -1330.09673                | 0.43168                     | 0.09527                      | -1331.69109                | -0.05394 | -1331.37719 | -1175.93727 | 23.39           |
| LHAu+_C6H4F         | C23H16AuFN     | -1175.21328                | 0.34898                     | 0.08493                      | -1176.62065                | -0.03821 | -1176.36678 | -1175.95949 | 9.45            |
| LHAu+_C6H4F_OMe2    | C25H22AuFNO    | -1330.14541                | 0.43741                     | 0.09753                      | -1331.73092                | -0.05561 | -1331.41446 | -1175.97454 | 0.00            |
| LAuC6F5             | C23H11AuF5N    | -1571.39489                | 0.30834                     | 0.09043                      | -1573.25943                | -0.03965 | -1573.05134 | -1573.05134 | 10.12           |



| Name                 | Formula          | E <sub>elec</sub><br>B3LYP | ΔH <sub>corr</sub><br>323 K | TΔS <sub>corr</sub><br>323 K | E <sub>elec</sub><br>TPSSH | DFTD3    | G           | on scale    | rel<br>kcal/mol |
|----------------------|------------------|----------------------------|-----------------------------|------------------------------|----------------------------|----------|-------------|-------------|-----------------|
| LAuC6F5_H+_OMe2      | C25H18AuF5NO     | -1726.71277                | 0.40931                     | 0.10473                      | -1728.75681                | -0.05485 | -1728.47253 | -1573.03261 | 21.87           |
| LAuC6F5_H+_OMe2_TS   | C25H18AuF5NO     | -1726.70862                | 0.40379                     | 0.10354                      | -1728.75111                | -0.05569 | -1728.47237 | -1573.03246 | 21.97           |
| LHAu+_C6F5           | C23H12AuF5N      | -1571.81933                | 0.32075                     | 0.09509                      | -1573.67738                | -0.04067 | -1573.46100 | -1573.05372 | 8.62            |
| LHAu+_C6F5_perpTS    | C23H12AuF5N      | -1571.81542                | 0.31980                     | 0.09225                      | -1573.67149                | -0.04022 | -1573.45372 | -1573.04643 | 13.20           |
| LHAu+_C6F5_OMe2      | C25H18AuF5NO     | -1726.75238                | 0.40943                     | 0.10648                      | -1728.78703                | -0.05843 | -1728.50738 | -1573.06746 | 0.00            |
| LHAu+_C6F5_OMe2_a    | C25H18AuF5NO     | -1726.75238                | 0.40944                     | 0.10590                      | -1728.78702                | -0.05846 | -1728.50699 | -1573.06707 | 0.24            |
| LbHAu+_C6F5          | C31H28AuF5N      | -1886.10330                | 0.55675                     | 0.12135                      | -1888.31919                | -0.06748 | -1887.91123 | -1887.91123 | 8.01            |
| LbHAu+_C6F5_perpTS   | C31H28AuF5N      | -1886.09899                | 0.55566                     | 0.12101                      | -1888.31286                | -0.06692 | -1887.90520 | -1887.90520 | 11.79           |
| LbHAu+_C6F5_OMe2     | C33H34AuF5NO     | -2041.03492                | 0.64545                     | 0.13267                      | -2043.42722                | -0.08596 | -2042.95662 | -1887.92399 | 0.00            |
| LFAuCl               | C17H9AuClF2N     | -1502.56171                | 0.23589                     | 0.07232                      | -1504.00068                | -0.02922 | -1503.84247 | -1503.84247 | 4.81            |
| LFAuCl_H+_OMe2       | C19H16AuClF2NO   | -1657.87894                | 0.33685                     | 0.08857                      | -1659.49732                | -0.04216 | -1659.26197 | -1503.82206 | 17.62           |
| LFAuCl_H+_OMe2_TS    | C19H16AuClF2NO   | -1657.87178                | 0.33084                     | 0.08687                      | -1659.48903                | -0.04351 | -1659.25991 | -1503.81999 | 18.92           |
| LFHAu+_Cl            | C17H10AuClF2N    | -1502.97790                | 0.24819                     | 0.07614                      | -1504.41094                | -0.03032 | -1504.24409 | -1503.83680 | 8.37            |
| LFHAuCl_2_2+         | C34H20Au2Cl2F4N2 | -3005.96066                | 0.49861                     | 0.13031                      | -3008.82402                | -0.07902 | -3008.49173 | -1503.83858 | 7.25            |
| LFHAu+_Cl_OMe2       | C19H16AuClF2NO   | -1657.91027                | 0.33658                     | 0.08857                      | -1659.52146                | -0.04582 | -1659.29005 | -1503.85014 | 0.00            |
| LOMeAuCl             | C19H15AuClNO2    | -1533.12429                | 0.32103                     | 0.08205                      | -1534.59901                | -0.03554 | -1534.36850 | -1534.36850 | 8.54            |
| LOMeAuCl_H+_OMe2     | C21H22AuClNO3    | -1688.44544                | 0.42174                     | 0.09849                      | -1690.09972                | -0.04896 | -1689.79293 | -1534.35301 | 18.25           |
| LOMeAuCl_H+_OMe2_TS  | C21H22AuClNO3    | -1688.43956                | 0.41577                     | 0.09732                      | -1690.09279                | -0.04992 | -1689.79215 | -1534.35223 | 18.74           |
| LOMeHAu+_Cl          | C19H16AuClNO2    | -1533.54874                | 0.33327                     | 0.08542                      | -1535.01842                | -0.03652 | -1534.77890 | -1534.37161 | 6.58            |
| LOMeHAuCl_2_2+       | C38H32Au2Cl2N2O4 | -3067.10376                | 0.66876                     | 0.14688                      | -3070.03794                | -0.09565 | -3069.56324 | -1534.37434 | 4.87            |
| LOMeHAu+_Cl_OMe2     | C21H22AuClNO3    | -1688.47829                | 0.42161                     | 0.09874                      | -1690.12508                | -0.05239 | -1689.82202 | -1534.38210 | 0.00            |
| LCOMeAuCl            | C21H15AuClNO2    | -1609.31261                | 0.33267                     | 0.08821                      | -1610.86761                | -0.03861 | -1610.63265 | -1610.63265 | 5.69            |
| LCOMeAuCl_H+_OMe2    | C23H22AuClNO3    | -1764.62987                | 0.43383                     | 0.10320                      | -1766.36441                | -0.05237 | -1766.05209 | -1610.61218 | 18.53           |
| LCOMeAuCl_H+_OMe2_TS | C23H22AuClNO3    | -1764.62338                | 0.42747                     | 0.10266                      | -1766.35638                | -0.05298 | -1766.05068 | -1610.61076 | 19.42           |
| LCOMeHAu+_Cl         | C21H16AuClNO2    | -1609.73119                | 0.34466                     | 0.09152                      | -1611.28059                | -0.03963 | -1611.03688 | -1610.62960 | 7.60            |
| LCOMeHAuCl_2_2+      | C42H32Au2Cl2N2O4 | -3219.47373                | 0.69219                     | 0.15533                      | -3222.56646                | -0.10302 | -3222.08136 | -1610.63340 | 5.22            |
| LCOMeHAu+_Cl_OMe2    | C23H22AuClNO3    | -1764.66300                | 0.43318                     | 0.10380                      | -1766.38997                | -0.05529 | -1766.08163 | -1610.64171 | 0.00            |
| ZAuCl                | C16H10AuClN2     | -1320.25187                | 0.23814                     | 0.06752                      | -1321.48438                | -0.02742 | -1321.31889 | -1321.31889 | 7.17            |
| ZAuCl_H+_OMe2        | C18H17AuClN2O    | -1475.56982                | 0.33906                     | 0.08457                      | -1476.98184                | -0.04062 | -1476.74007 | -1321.30015 | 18.93           |
| ZAuCl_H+_OMe2_TS     | C18H17AuClN2O    | -1475.56407                | 0.33307                     | 0.08232                      | -1476.97491                | -0.04169 | -1476.73869 | -1321.29877 | 19.80           |

| Name               | Formula        | E <sub>elec</sub><br>B3LYP | ΔH <sub>corr</sub><br>323 K | TΔS <sub>corr</sub><br>323 K | E <sub>elec</sub><br>TPSSH | DFTD3    | G           | on scale    | rel<br>kcal/mol |
|--------------------|----------------|----------------------------|-----------------------------|------------------------------|----------------------------|----------|-------------|-------------|-----------------|
| ZHAu+_Cl           | C16H11AuClN2   | -1320.67226                | 0.25055                     | 0.07161                      | -1321.89858                | -0.02846 | -1321.72447 | -1321.31718 | 8.24            |
| ZHAuCl_2_2+        | C32H22Au2Cl2N4 | -2641.34979                | 0.50339                     | 0.11835                      | -2643.79986                | -0.07465 | -2643.45041 | -1321.31792 | 7.78            |
| ZHAu+_Cl_OMe2      | C18H17AuClN2O  | -1475.60511                | 0.33913                     | 0.08360                      | -1477.00950                | -0.04385 | -1476.77023 | -1321.33032 | 0.00            |
| HZAuCl+            | C16H11AuClN2   | -1320.66511                | 0.25182                     | 0.06829                      | -1321.90042                | -0.02808 | -1321.72245 | -1321.72245 | -9.18           |
| HZAuCl_H2+_OMe2    | C18H18AuClN2O  | -1475.96659                | 0.35371                     | 0.08192                      | -1477.38186                | -0.04022 | -1477.12325 | -1321.68333 | 15.36           |
| HZAuCl_H2+_OMe2_TS | C18H18AuClN2O  | -1475.95472                | 0.34698                     | 0.08226                      | -1477.36841                | -0.04205 | -1477.11859 | -1321.67867 | 18.29           |
| HZHAu2+_Cl         | C16H12AuClN2   | -1321.05600                | 0.26414                     | 0.07126                      | -1322.28586                | -0.02902 | -1322.09848 | -1321.69120 | 10.43           |
| HZHAuCl_2_4+       | C32H24Au2Cl2N4 | -2642.09207                | 0.53133                     | 0.11725                      | -2644.54767                | -0.07537 | -2644.17027 | -1321.67785 | 18.81           |
| HZHAu2+_Cl_OMe2    | C18H18AuClN2O  | -1475.99416                | 0.35334                     | 0.08253                      | -1477.40151                | -0.04426 | -1477.14774 | -1321.70782 | 0.00            |

<sup>a</sup> For each block, reference: LHAuZ+\_OR2

**Table S4. Predicted substituent effects (kcal/mol) on deprotonation barriers of [(C<sup>N</sup>-CH)AuX]<sup>+</sup>.**<sup>a</sup>

| Subst at<br>C <sup>N</sup> ^C | X                                         | Base             | ΔG <sup>‡</sup><br>A-TS-D | ΔG <sub>rxn</sub><br>A-F+H(OR <sub>2</sub> ) <sub>2</sub> <sup>+</sup> |
|-------------------------------|-------------------------------------------|------------------|---------------------------|------------------------------------------------------------------------|
| -                             | Cl                                        | OMe <sub>2</sub> | 19.42                     | 8.68                                                                   |
| -                             | Cl                                        | OEt <sub>2</sub> | 15.53                     | 5.06                                                                   |
| <i>t</i> Bu                   | Cl                                        | OMe <sub>2</sub> | 18.77                     | 9.86                                                                   |
| <i>t</i> Bu                   | Cl                                        | OEt <sub>2</sub> | 15.48                     | 6.74                                                                   |
| F                             | Cl                                        | OMe <sub>2</sub> | 18.92                     | 4.81                                                                   |
| COMe                          | Cl                                        | OMe <sub>2</sub> | 19.42                     | 5.69                                                                   |
| OMe                           | Cl                                        | OMe <sub>2</sub> | 18.74                     | 8.54                                                                   |
| -                             | I                                         | OMe <sub>2</sub> | 17.56                     | 6.87                                                                   |
| -                             | C <sub>6</sub> F <sub>5</sub>             | OMe <sub>2</sub> | 21.97                     | 10.12                                                                  |
| -                             | C <sub>6</sub> H <sub>5</sub>             | OMe <sub>2</sub> | 23.40                     | 15.64                                                                  |
| -                             | <i>p</i> -C <sub>6</sub> H <sub>4</sub> F | OMe <sub>2</sub> | 23.39                     | 15.15                                                                  |

<sup>a</sup> Free energies evaluated at 50 °C.
